# Supplementary material
Source: Springer Nature journal article supplement (https://www.springermedizin.de/resource/supplementary/13075_2009_2584_MOESM2_ESM.pdf/9692424)
Supplement: MOESM2 [file 9692424]

**Table S2** List of 719 genes differentially expressed at early RA (eRA) *versus* long-standing RA (LSRA)

| uniqID | IMAGE Id | UGCluster            | Name                                          | Symbol   | eRA Group mean | LS RA Group mean | Fold change | P value |
|--------|----------|----------------------|-----------------------------------------------|----------|----------------|------------------|-------------|---------|
| 13     | 114385   | Hs.190621            | Data not found                                |          | -0.777         | -0.289           | 2.69        | <1E-04  |
| 24     | 123172   | Data not found       | Data not found                                |          | -0.101         | -0.566           | 0.18        | <1E-04  |
| 31     | 114702   | Hs.456557            | Chromosome 1 open reading frame 164           | C1orf164 | 0.425          | -0.341           | -1.25       | <1E-04  |
| 32     | 120866   | Hs.269577            | Data not found                                |          | 0.342          | -0.556           | -0.62       | <1E-04  |
| 41     | 120075   | Hs.17483             | CD4 molecule                                  | CD4      | 0.435          | -0.568           | -0.77       | <1E-04  |
| 42     | 122764   | Hs.33642             | Archain 1                                     | ARCN1    | 0.033          | -0.721           | -0.05       | <1E-04  |
| 50     | 120918   | Hs.523443            | Hemoglobin, beta                              | HBB      | 0.381          | -0.631           | -0.6        | <1E-04  |
| 61     | 127380   | Hs.20205             | Hemoglobin, beta pseudogene 1                 | HBBP1    | 0.622          | -0.105           | -5.93       | <1E-04  |
| 106    | 128226   | Hs.159525            | Ketohexokinase (fructokinase)                 | KHK      | 0.296          | -0.170           | -1.75       | <1E-04  |
| 165    | 110538   | Hs.530943            | Data not found                                |          | -0.461         | 0.026            | -17.41      | <1E-04  |
| 170    | 193197   | Data not found       | Data not found                                |          | 0.261          | -0.033           | -7.97       | <1E-04  |
| 193    | 114910   | Data not found       | Data not found                                |          | -0.556         | -0.138           | 4.03        | <1E-04  |
| 221    | 122016   | Hs.509872            | Data not found                                |          | 0.911          | -0.226           | -4.03       | <1E-04  |
| 239    | 122500   | In multiple clusters | In multiple clusters                          |          | 0.048          | -0.200           | -0.24       | <1E-04  |
| 240    | 126241   | In multiple clusters | Serpin peptidase inhibitor, clade E, member 1 | SERPINE1 | 0.182          | -0.140           | -1.3        | <1E-04  |
| 241    | 151951   | Hs.513491            | Yippee-like 3 (Drosophila)                    | YPEL3    | 0.215          | 0.029            | 7.5         | <1E-04  |
| 242    | 195723   | Hs.77741             | In multiple clusters                          |          | 0.371          | 0.027            | 13.48       | <1E-04  |
| 247    | 115082   | Hs.16247             | Data not found                                |          | 0.229          | -0.282           | -0.81       | <1E-04  |
| 249    | 124759   | Hs.564321            | Transcribed locus                             |          | 0.436          | -0.388           | -1.13       | <1E-04  |
| 251    | 194959   | Hs.473554            | Data not found                                |          | 0.806          | -0.044           | -18.19      | <1E-04  |
| 256    | 116644   | Hs.50308             | Huntingtin interacting protein 2              | HIP2     | 1.390          | -0.119           | -11.72      | <1E-04  |
| 257    | 122020   | Hs.443057            | CD53 molecule                                 | CD53     | 0.028          | -0.362           | -0.08       | <1E-04  |
| 258    | 126699   | Hs.19872             | Homo sapiens, clone IMAGE:3883659, mRNA       |          | 0.078          | -0.413           | -0.19       | <1E-04  |
| 265    | 115642   | Data not found       | Data not found                                |          | 0.362          | -0.292           | -1.24       | <1E-04  |
| 275    | 122022   | Data not found       | Data not found                                |          | 0.186          | -0.176           | -1.06       | <1E-04  |
| 298    | 82881    | Hs.525264            | Complement component 1, r subcomponent-like   | C1RL     | 0.353          | 0.058            | 6.14        | <1E-04  |
| 373    | 114714   | Hs.534255            | Beta-2-microglobulin                          | B2M      | 0.425          | -0.133           | -3.19       | <1E-04  |
| 395    | 195766   | Hs.479693            | Transcribed locus                             |          | 0.473          | 0.040            | 11.74       | <1E-04  |

|      |        |                      |                                                       |           |        |        |         |        |
|------|--------|----------------------|-------------------------------------------------------|-----------|--------|--------|---------|--------|
| 409  | 115772 | Data not found       | Data not found                                        |           | 0.456  | -0.036 | -12.66  | <1E-04 |
| 419  | 122435 | Hs.434253            | HCG2003663                                            |           | 0.594  | -0.083 | -7.12   | <1E-04 |
| 446  | 121297 | Hs.500375            | Ectonucleoside triphosphate diphosphohydrolase 6      | ENTPD6    | 1.083  | 0.073  | 14.88   | <1E-04 |
| 502  | 127831 | Hs.350268            | Interferon regulatory factor 2 binding protein 2      | IRF2BP2   | -0.393 | 0.076  | -5.14   | <1E-04 |
| 508  | 113984 | Hs.12102             | Sorting nexin 3                                       | SNX3      | 0.393  | -0.069 | -5.66   | <1E-04 |
| 595  | 61387  | Hs.558493            | Taste receptor, type 2, member 14                     | TAS2R14   | 0.198  | -0.456 | -0.43   | <1E-04 |
| 604  | 77923  | Hs.149035            | Transcribed locus                                     |           | 0.316  | -0.043 | -7.43   | <1E-04 |
| 623  | 109097 | Hs.397609            | Ribosomal protein S16                                 | RPS16     | -0.146 | -0.722 | 0.2     | <1E-04 |
| 636  | 123215 | In multiple clusters | Full length insert cDNA clone YR55D08                 |           | 0.531  | 0.144  | 3.69    | <1E-04 |
| 637  | 127607 | Hs.79018             | Data not found                                        |           | 0.322  | -0.044 | -7.38   | <1E-04 |
| 679  | 114748 | Hs.175120            | Hypothetical protein FLJ11286                         | FLJ11286  | 0.190  | -0.112 | -1.69   | <1E-04 |
| 683  | 195530 | Hs.534330            | Metallothionein 1E                                    | MT1E      | 0.418  | -0.064 | -6.5    | <1E-04 |
| 714  | 112471 | Hs.180909            | Peroxiredoxin 1                                       | PRDX1     | 0.419  | -0.612 | -0.68   | <1E-04 |
| 793  | 84418  | Hs.238996            | In multiple clusters                                  |           | 0.493  | 0.079  | 6.27    | <1E-04 |
| 811  | 83707  | Hs.435515            | Hypothetical protein LOC255167                        | LOC255167 | 0.710  | 0.261  | 2.72    | <1E-04 |
| 812  | 110227 | Hs.567389            | Mitogen-activated protein kinase 1                    | MAPK1     | 0.041  | -0.228 | -0.18   | <1E-04 |
| 840  | 112077 | Hs.412370            | Ribosomal protein L9                                  | RPL9      | -0.141 | -0.746 | 0.19    | <1E-04 |
| 849  | 113630 | Data not found       | Data not found                                        |           | 0.355  | -0.218 | -1.62   | <1E-04 |
| 859  | 115223 | Hs.280604            | Data not found                                        |           | 0.448  | 0.125  | 3.59    | <1E-04 |
| 870  | 123612 | Hs.368944            | Data not found                                        |           | -0.390 | -0.019 | 20.35   | <1E-04 |
| 899  | 194314 | Hs.249181            | Data not found                                        |           | 0.536  | 0.010  | 51.43   | <1E-04 |
| 904  | 114076 | Hs.117067            | Data not found                                        |           | 0.268  | 0.028  | 9.64    | <1E-04 |
| 1021 | 114926 | Data not found       | Data not found                                        |           | 0.965  | -0.361 | -2.67   | <1E-04 |
| 1029 | 110608 | In multiple clusters | Homogentisate 1,2-dioxygenase                         | HGD       | 0.337  | 0.033  | 10.08   | <1E-04 |
| 1099 | 84101  | Hs.318894            | G protein-coupled receptor 126                        | GPR126    | 0.460  | 0.070  | 6.6     | <1E-04 |
| 1106 | 196202 | Hs.538189            | Transcribed locus                                     |           | -0.857 | -0.077 | 11.15   | <1E-04 |
| 1112 | 121347 | In multiple clusters | In multiple clusters                                  |           | 0.524  | -0.509 | -1.03   | <1E-04 |
| 1126 | 81796  | Hs.1360              | Cytochrome P450, family 2, subfamily B, polypeptide 6 | CYP2B6    | 0.386  | -0.174 | -2.22   | <1E-04 |
| 1148 | 121656 | Hs.432690            | Solute carrier family 39 (zinc transporter), member 9 | SLC39A9   | 0.378  | -0.007 | -55.61  | <1E-04 |
| 1155 | 113265 | Hs.355708            | Transmembrane protein 127                             | TMEM127   | 0.479  | -0.004 | -122.36 | <1E-04 |

|      |        |                      |                                                        |           |        |        |        |        |
|------|--------|----------------------|--------------------------------------------------------|-----------|--------|--------|--------|--------|
| 1156 | 115880 | Hs.559340            | Hypothetical protein LOC285074                         | LOC285074 | -0.099 | -0.433 | 0.23   | <1E-04 |
| 1157 | 122872 | Hs.120817            | Data not found                                         |           | 0.356  | -0.102 | -3.5   | <1E-04 |
| 1163 | 109718 | Data not found       | Data not found                                         |           | 0.478  | 0.001  | 343.93 | <1E-04 |
| 1167 | 124828 | Hs.161000            | Data not found                                         |           | 2.065  | 0.215  | 9.62   | <1E-04 |
| 1174 | 116322 | Data not found       | Data not found                                         |           | 0.441  | 0.018  | 24.02  | <1E-04 |
| 1187 | 195586 | Hs.476982            | Data not found                                         |           | 0.218  | -0.129 | -1.69  | <1E-04 |
| 1191 | 113316 | Hs.472838            | In multiple clusters                                   |           | 0.171  | -0.419 | -0.41  | <1E-04 |
| 1208 | 110218 | Hs.283884            | Clone IMAGE:110218 mRNA sequence                       |           | 0.189  | -0.072 | -2.62  | <1E-04 |
| 1223 | 195472 | Hs.406184            | FGFR1 oncogene partner 2                               | FGFR1OP2  | 0.632  | 0.046  | 13.82  | <1E-04 |
| 1232 | 196627 | Hs.138499            | Transcribed locus                                      |           | 1.160  | 0.047  | 24.69  | <1E-04 |
| 1244 | 110635 | In multiple clusters | In multiple clusters                                   |           | 0.305  | -0.610 | -0.5   | <1E-04 |
| 1253 | 109050 | Hs.446427            | In multiple clusters                                   |           | 0.580  | -0.605 | -0.96  | <1E-04 |
| 1259 | 195381 | Hs.549777            | Full length insert cDNA clone YP97D11                  |           | 0.559  | 0.104  | 5.35   | <1E-04 |
| 1290 | 112126 | In multiple clusters | Tumor protein, translationally-controlled 1            | TPT1      | 0.034  | -0.985 | -0.03  | <1E-04 |
| 1310 | 121393 | Hs.17892             | Transcribed locus                                      |           | 0.242  | -0.224 | -1.08  | <1E-04 |
| 1352 | 108246 | Hs.431850            | Data not found                                         |           | 0.493  | -0.031 | -15.76 | <1E-04 |
| 1418 | 120995 | Hs.522932            | Nuclear receptor coactivator 4                         | NCOA4     | 0.097  | -0.650 | -0.15  | <1E-04 |
| 1488 | 111654 | Hs.75969             | Proline-rich nuclear receptor coactivator 1            | PNRC1     | -0.060 | -0.354 | 0.17   | <1E-04 |
| 1517 | 122909 | Data not found       | Data not found                                         |           | 1.112  | -0.092 | -12.02 | <1E-04 |
| 1562 | 121731 | Hs.131459            | Cytochrome P450, family 4, subfamily F, polypeptide 12 | CYP4F12   | 0.077  | -0.199 | -0.39  | <1E-04 |
| 1578 | 112442 | Hs.509447            | Data not found                                         |           | 0.495  | -0.016 | -30.45 | <1E-04 |
| 1589 | 122540 | Hs.497967            | Data not found                                         |           | -0.200 | -0.349 | 0.57   | <1E-04 |
| 1595 | 109766 | Hs.469331            | START domain containing 7                              | STARD7    | 0.245  | -0.497 | -0.49  | <1E-04 |
| 1630 | 83045  | Data not found       | Data not found                                         |           | 0.611  | 0.031  | 19.67  | <1E-04 |
| 1642 | 116618 | Hs.413208            | AarF domain containing kinase 1                        | ADCK1     | 0.674  | -0.103 | -6.51  | <1E-04 |
| 1643 | 122174 | Hs.389171            | PTEN induced putative kinase 1                         | PINK1     | 0.032  | -0.144 | -0.22  | <1E-04 |
| 1660 | 116732 | Data not found       | Data not found                                         |           | 1.537  | 0.470  | 3.27   | <1E-04 |
| 1663 | 37354  | Hs.188757            | Potassium channel tetramerisation domain containing 20 | KCTD20    | 0.378  | 0.123  | 3.07   | <1E-04 |
| 1664 | 196645 | Hs.268849            | Glyoxalase I                                           | GLO1      | 1.164  | 0.133  | 8.75   | <1E-04 |
| 1673 | 194753 | Hs.493272            | Ankyrin repeat domain 15                               | ANKRD15   | 1.084  | 0.113  | 9.6    | <1E-04 |

|      |        |                      |                                                           |           |        |        |        |        |
|------|--------|----------------------|-----------------------------------------------------------|-----------|--------|--------|--------|--------|
| 1677 | 113347 | Hs.111903            | Data not found                                            |           | 0.489  | -0.007 | -69.95 | <1E-04 |
| 1678 | 116431 | Data not found       | Data not found                                            |           | 0.342  | -0.566 | -0.6   | <1E-04 |
| 1715 | 122131 | Hs.246112            | Activating signal cointegrator 1 complex subunit 3-like 1 | ASCC3L1   | 0.362  | 0.116  | 3.13   | <1E-04 |
| 1720 | 82173  | Hs.15400             | Dexamethasone-induced transcript                          | DEXI      | 1.882  | 1.064  | 1.77   | <1E-04 |
| 1756 | 78051  | Hs.154078            | Lipopolysaccharide binding protein                        | LBP       | 0.547  | -0.006 | -93.72 | <1E-04 |
| 1787 | 120320 | Hs.532399            | Zinc finger CCCH-type containing 11A                      | ZC3H11A   | 0.078  | -0.243 | -0.32  | <1E-04 |
| 1817 | 194401 | Hs.381058            | Data not found                                            |           | 0.682  | 0.150  | 4.53   | <1E-04 |
| 1844 | 191725 | Data not found       | Data not found                                            |           | 0.649  | 0.048  | 13.43  | <1E-04 |
| 1893 | 111388 | Hs.499038            | Tyrosine 3-monooxygenase/tryptophan 5-monooxygenase       | YWHAZ     | 0.391  | -0.259 | -1.51  | <1E-04 |
| 1907 | 194398 | Hs.435136            | Thioredoxin                                               | TXN       | 0.406  | -0.622 | -0.65  | <1E-04 |
| 1961 | 195533 | Hs.538417            | Transcribed locus                                         |           | 1.403  | 0.092  | 15.2   | <1E-04 |
| 1983 | 113381 | Hs.500159            | Similar to Estradiol 17-beta-dehydrogenase 1              | LOC643646 | 0.392  | -0.048 | -8.23  | <1E-04 |
| 1985 | 122161 | Hs.124147            | Data not found                                            |           | 0.324  | 0.073  | 4.46   | <1E-04 |
| 1995 | 125271 | Hs.529892            | Sequestosome 1                                            | SQSTM1    | -0.647 | -0.329 | 1.97   | <1E-04 |
| 2021 | 122698 | Hs.5148              | Data not found                                            |           | 0.289  | -0.153 | -1.88  | <1E-04 |
| 2044 | 83075  | Hs.369920            | RAP1B, member of RAS oncogene family                      | RAP1B     | 0.293  | -0.398 | -0.74  | <1E-04 |
| 2096 | 197109 | Hs.99886             | Transcribed locus                                         |           | 0.529  | 0.104  | 5.07   | <1E-04 |
| 2131 | 129909 | In multiple clusters | In multiple clusters                                      |           | -0.291 | 0.193  | -1.51  | <1E-04 |
| 2147 | 122590 | In multiple clusters | In multiple clusters                                      |           | 0.213  | -0.063 | -3.38  | <1E-04 |
| 2173 | 114625 | Hs.530727            | CDNA FLJ32454 fis, clone SKNMC1000007                     |           | 0.569  | -0.426 | -1.34  | <1E-04 |
| 2224 | 78956  | Hs.567289            | Data not found                                            |           | 0.494  | -0.004 | -136.2 | <1E-04 |
| 2231 | 194049 | Hs.380277            | Data not found                                            |           | 0.467  | 0.050  | 9.41   | <1E-04 |
| 2244 | 111843 | Data not found       | Data not found                                            |           | 0.247  | -0.118 | -2.1   | <1E-04 |
| 2249 | 194464 | Hs.370834            | Transcribed locus                                         |           | 0.344  | -0.043 | -7.95  | <1E-04 |
| 2255 | 120372 | Data not found       | Data not found                                            |           | 0.225  | -0.214 | -1.05  | <1E-04 |
| 2308 | 114208 | Hs.546239            | Alpha-2-glycoprotein 1, zinc-binding                      | AZGP1     | 0.413  | -0.522 | -0.79  | <1E-04 |
| 2363 | 120717 | Hs.336994            | Data not found                                            |           | 0.376  | 0.107  | 3.53   | <1E-04 |
| 2371 | 115004 | Data not found       | Data not found                                            |           | 0.209  | -0.100 | -2.08  | <1E-04 |
| 2379 | 113573 | Hs.37706             | Data not found                                            |           | 0.086  | -0.761 | -0.11  | <1E-04 |
| 2407 | 115322 | Hs.191887            | Sec61 beta subunit                                        | SEC61B    | -0.140 | -0.498 | 0.28   | <1E-04 |

|      |        |                      |                                                        |           |        |        |          |        |
|------|--------|----------------------|--------------------------------------------------------|-----------|--------|--------|----------|--------|
| 2413 | 83860  | Data not found       | Data not found                                         |           | 0.190  | -0.175 | -1.09    | <1E-04 |
| 2438 | 196350 | Hs.482103            | Data not found                                         |           | 0.478  | -0.041 | -11.54   | <1E-04 |
| 2474 | 196379 | Hs.391860            | Data not found                                         |           | 0.170  | -0.223 | -0.76    | <1E-04 |
| 2479 | 115285 | Hs.252828            | Processing of precursor 1, ribonuclease P/MRP subunit  | POP1      | 0.110  | -0.230 | -0.48    | <1E-04 |
| 2512 | 81927  | Hs.474436            | Hermansky-Pudlak syndrome 4                            | HPS4      | 0.636  | 0.133  | 4.77     | <1E-04 |
| 2540 | 110392 | Hs.247077            | Ras homolog gene family, member A                      | RHOA      | 0.544  | -0.719 | -0.76    | <1E-04 |
| 2618 | 193322 | Hs.520048            | Major histocompatibility complex, class II, DR alpha   | HLA-DRA   | 0.234  | -0.545 | -0.43    | <1E-04 |
| 2650 | 114259 | Hs.186544            | Data not found                                         |           | 0.287  | -0.083 | -3.45    | <1E-04 |
| 2668 | 114248 | Hs.7720              | Dynein, cytoplasmic 1, heavy chain 1                   | DYNC1H1   | 0.384  | -0.692 | -0.56    | <1E-04 |
| 2756 | 108252 | In multiple clusters | Prosaposin                                             | PSAP      | 0.479  | -1.305 | -0.37    | <1E-04 |
| 2777 | 119636 | Hs.444915            | Solute carrier family 1, member 1                      | SLC1A1    | 0.813  | 0.241  | 3.37     | <1E-04 |
| 2872 | 82301  | Hs.515835            | Sulfotransferase family, cytosolic, 2A, member 1       | SULT2A1   | 0.592  | 0.000  | -1899.59 | <1E-04 |
| 2876 | 121976 | Hs.25647             | V-fos FBJ murine osteosarcoma viral oncogene           | FOS       | -0.084 | -0.496 | 0.17     | <1E-04 |
| 2924 | 196428 | Hs.486095            | CDNA FLJ11366 fis, clone HEMBA1000282                  |           | 1.581  | 0.255  | 6.21     | <1E-04 |
| 2957 | 122845 | Hs.502765            | Hypothetical LOC643517                                 | LOC643517 | -0.255 | 0.175  | -1.46    | <1E-04 |
| 2962 | 83074  | Data not found       | Transcribed locus                                      |           | 0.492  | -0.038 | -13.02   | <1E-04 |
| 2963 | 110059 | Hs.507971            | Data not found                                         |           | -0.056 | -0.745 | 0.08     | <1E-04 |
| 2969 | 195547 | Hs.136829            | Data not found                                         |           | 0.504  | 0.005  | 95.57    | <1E-04 |
| 3004 | 128852 | Hs.512001            | Glycosylphosphatidylinositol specific phospholipase D1 | GPLD1     | -0.283 | 0.280  | -1.01    | <1E-04 |
| 3013 | 42197  | Hs.79101             | Cyclin G1                                              | CCNG1     | 0.248  | -0.497 | -0.5     | <1E-04 |
| 3022 | 129239 | In multiple clusters | In multiple clusters                                   |           | 0.083  | -0.938 | -0.09    | <1E-04 |
| 3029 | 120569 | Data not found       | Data not found                                         |           | 0.394  | 0.018  | 22.45    | <1E-04 |
| 3074 | 121209 | Hs.191330            | CDNA FLJ42255 fis, clone TKIDN2009889                  |           | 0.214  | -0.207 | -1.03    | <1E-04 |
| 3082 | 114270 | Hs.431099            | PDZK1 interacting protein 1                            | PDZK1IP1  | 0.186  | -0.106 | -1.75    | <1E-04 |
| 3092 | 121591 | Hs.439815            | Hepatitis B virus x interacting protein                | HBXIP     | 0.297  | -0.373 | -0.8     | <1E-04 |
| 3095 | 194560 | Hs.23751             | ADAM metallopeptidase with thrombospondin              | ADAMTS19  | 0.374  | -0.233 | -1.61    | <1E-04 |
| 3116 | 108293 | Hs.150580            | Eukaryotic translation initiation factor 1             | EIF1      | 0.046  | -0.971 | -0.05    | <1E-04 |
| 3164 | 121596 | Data not found       | Data not found                                         |           | 0.492  | -0.006 | -86.74   | <1E-04 |
| 3170 | 108405 | Hs.439552            | Eukaryotic translation elongation factor 1 alpha 1     | EEF1A1    | 0.027  | -1.044 | -0.03    | <1E-04 |
| 3179 | 108930 | Hs.522767            | Solute carrier family 25, member 5                     | SLC25A5   | -0.111 | -0.948 | 0.12     | <1E-04 |

|      |        |                      |                                                  |          |        |        |        |        |
|------|--------|----------------------|--------------------------------------------------|----------|--------|--------|--------|--------|
| 3190 | 113922 | Hs.567377            | Data not found                                   |          | 0.049  | -0.483 | -0.1   | <1E-04 |
| 3214 | 78594  | Hs.172028            | In multiple clusters                             |          | 0.192  | -0.172 | -1.12  | <1E-04 |
| 3227 | 120612 | Data not found       | Data not found                                   |          | 0.751  | 0.178  | 4.21   | <1E-04 |
| 3246 | 126672 | Hs.9754              | Activating transcription factor 5                | ATF5     | 0.383  | -0.079 | -4.84  | <1E-04 |
| 3257 | 194856 | Hs.499000            | Data not found                                   |          | 1.147  | 0.035  | 32.92  | <1E-04 |
| 3298 | 116914 | Hs.495511            | MRNA; cDNA DKFZp686O02112                        |          | -0.056 | -1.231 | 0.05   | <1E-04 |
| 3299 | 122307 | Hs.555925            | Armadillo repeat containing 8                    | ARMC8    | 0.281  | -0.006 | -45.66 | <1E-04 |
| 3302 | 196827 | Hs.546286            | Ribosomal protein S3                             | RPS3     | 0.599  | -0.115 | -5.21  | <1E-04 |
| 3311 | 195299 | Hs.504877            | Rho GDP dissociation inhibitor (GDI) beta        | ARHGDIB  | 0.296  | -0.202 | -1.46  | <1E-04 |
| 3318 | 126952 | Hs.443977            | Data not found                                   |          | 0.221  | -0.118 | -1.87  | <1E-04 |
| 3319 | 161128 | Hs.522568            | Phosphatidylinositol-specific phospholipase CXD1 | PLCXD1   | 0.471  | -0.015 | -31.52 | <1E-04 |
| 3336 | 126565 | In multiple clusters | Protein disulfide isomerase family A, member 6   | PDIA6    | 0.240  | -0.234 | -1.03  | <1E-04 |
| 3345 | 125304 | Hs.75599             | Serpin peptidase inhibitor, clade C, member 1    | SERPINC1 | 0.353  | -0.160 | -2.21  | <1E-04 |
| 3346 | 130011 | In multiple clusters | Data not found                                   |          | 0.385  | -0.153 | -2.51  | <1E-04 |
| 3349 | 84348  | Data not found       | Data not found                                   |          | 0.551  | 0.080  | 6.88   | <1E-04 |
| 3413 | 109701 | Data not found       | Data not found                                   |          | 0.452  | 0.097  | 4.65   | <1E-04 |
| 3415 | 115434 | Hs.10739             | Transcribed locus                                |          | 0.684  | -0.196 | -3.48  | <1E-04 |
| 3422 | 110420 | In multiple clusters | In multiple clusters                             |          | -0.031 | -0.839 | 0.04   | <1E-04 |
| 3424 | 116816 | Hs.541269            | Data not found                                   |          | 0.255  | -0.210 | -1.21  | <1E-04 |
| 3462 | 346009 | In multiple clusters | Phosphofructokinase, liver                       | PFKL     | -1.926 | -0.592 | 3.25   | <1E-04 |
| 3469 | 244659 | Hs.133352            | Data not found                                   |          | 0.134  | -0.136 | -0.98  | <1E-04 |
| 3567 | 211116 | Hs.420272            | H2A histone family, member Y                     | H2AFY    | 0.675  | -0.128 | -5.27  | <1E-04 |
| 3583 | 198826 | Hs.533787            | KIAA0286 protein                                 | KIAA0286 | 3.193  | 1.926  | 1.66   | <1E-04 |
| 3601 | 198828 | Hs.520814            | Tensin 3                                         | TNS3     | 1.816  | 0.330  | 5.5    | <1E-04 |
| 3603 | 212252 | Hs.536876            | CDC42 small effector 2                           | CDC42SE2 | 1.075  | 0.501  | 2.15   | <1E-04 |
| 3619 | 198542 | Hs.425125            | Ribosomal protein L29                            | RPL29    | 0.528  | 0.038  | 13.79  | <1E-04 |
| 3650 | 292534 | Hs.510375            | Nucleoporin 43kDa                                | NUP43    | -0.364 | 0.287  | -1.27  | <1E-04 |
| 3703 | 245332 | Hs.534293            | Serpin peptidase inhibitor, clade A, member 3    | SERPINA3 | -0.392 | 0.061  | -6.45  | <1E-04 |
| 3721 | 245736 | Hs.143347            | Data not found                                   |          | -0.578 | 0.106  | -5.43  | <1E-04 |
| 3739 | 244875 | Hs.533013            | Cystathionine-beta-synthase                      | CBS      | -0.512 | -0.045 | 11.49  | <1E-04 |

|      |        |                |                                                    |           |        |        |        |        |
|------|--------|----------------|----------------------------------------------------|-----------|--------|--------|--------|--------|
| 3757 | 245289 | Hs.403790      | Solute carrier family 25, member 28                | SLC25A28  | -0.273 | 0.065  | -4.19  | <1E-04 |
| 3770 | 125073 | Hs.397609      | Ribosomal protein S16                              | RPS16     | 0.106  | -0.740 | -0.14  | <1E-04 |
| 3779 | 120874 | Hs.368078      | DnaJ (Hsp40) homolog, subfamily A, member 2        | DNAJA2    | -0.121 | -0.880 | 0.14   | <1E-04 |
| 3791 | 206895 | Hs.292754      | Transcribed locus                                  |           | 0.865  | -0.015 | -57.12 | <1E-04 |
| 3817 | 202769 | Data not found | Data not found                                     |           | -0.028 | 0.426  | -0.07  | <1E-04 |
| 3819 | 234137 | Hs.559043      | Hypothetical gene supported by AF086559; BC065734  | LOC441383 | 0.490  | 0.269  | 1.82   | <1E-04 |
| 3847 | 245750 | Hs.512155      | Haptoglobin-related protein                        | HPR       | -0.431 | 0.094  | -4.58  | <1E-04 |
| 3856 | 254090 | Hs.496710      | Stromal antigen 2                                  | STAG2     | -0.398 | 0.316  | -1.26  | <1E-04 |
| 3935 | 206115 | Hs.232021      | Transcribed locus                                  |           | -0.647 | -0.139 | 4.66   | <1E-04 |
| 4001 | 279847 | Hs.6790        | DnaJ (Hsp40) homolog, subfamily B, member 9        | DNAJB9    | -0.208 | 0.343  | -0.61  | <1E-04 |
| 4007 | 206164 | Data not found | Data not found                                     |           | 0.143  | -0.546 | -0.26  | <1E-04 |
| 4015 | 198503 | Hs.474584      | Aldo-keto reductase family 1, member A1            | AKR1A1    | 0.223  | -0.078 | -2.86  | <1E-04 |
| 4037 | 275985 | Hs.529438      | Hypermethylated in cancer 2                        | HIC2      | -0.451 | 0.185  | -2.44  | <1E-04 |
| 4045 | 243350 | Hs.268788      | In multiple clusters                               |           | -0.553 | 0.223  | -2.48  | <1E-04 |
| 4291 | 21771  | Hs.504828      | DEAD (Asp-Glu-Ala-Asp) box polypeptide 47          | DDX47     | 1.069  | 0.019  | 56.75  | <1E-04 |
| 4296 | 233823 | Hs.484371      | Mitogen-activated protein kinase 9                 | MAPK9     | -0.528 | 0.072  | -7.36  | <1E-04 |
| 4306 | 258448 | Hs.536567      | Hypothetical protein LOC728730                     | LOC728730 | 1.098  | 0.139  | 7.91   | <1E-04 |
| 4316 | 294118 | Data not found | Data not found                                     |           | -0.535 | -0.009 | 60.7   | <1E-04 |
| 4324 | 241937 | Hs.446118      | Data not found                                     |           | 0.188  | -0.189 | -1     | <1E-04 |
| 4333 | 243049 | Data not found | Data not found                                     |           | 0.482  | 0.054  | 8.91   | <1E-04 |
| 4335 | 364825 | Hs.523913      | CDNA FLJ30156 fis, clone BRACE2000487              |           | 0.375  | 0.076  | 4.93   | <1E-04 |
| 4369 | 244306 | Hs.22500       | Data not found                                     |           | -0.556 | -0.033 | 17.02  | <1E-04 |
| 4442 | 293654 | Hs.370689      | Data not found                                     |           | -0.192 | 0.032  | -6.04  | <1E-04 |
| 4490 | 109437 | Hs.14894       | Trans-golgi network protein 2                      | TGOLN2    | -0.773 | -0.156 | 4.96   | <1E-04 |
| 4541 | 298615 | Hs.79387       | Proteasome (prosome, macropain)                    | PSMC5     | 0.146  | -0.419 | -0.35  | <1E-04 |
| 4546 | 200881 | Hs.415576      | KIAA1450 protein                                   | KIAA1450  | 0.022  | -0.288 | -0.08  | <1E-04 |
| 4550 | 294507 | Hs.529925      | Ubiquitin protein ligase E3 component n-recognin 2 | UBR2      | 0.506  | -0.194 | -2.61  | <1E-04 |
| 4552 | 430061 | Hs.34576       | Data not found                                     |           | 0.065  | -0.342 | -0.19  | <1E-04 |
| 4568 | 294171 | Hs.292493      | X-ray repair complementing defective repair        | XRCC6     | -0.420 | -0.107 | 3.93   | <1E-04 |
| 4575 | 240050 | Data not found | Data not found                                     |           | 0.418  | 0.033  | 12.59  | <1E-04 |

|      |        |                |                                                             |        |        |        |       |        |
|------|--------|----------------|-------------------------------------------------------------|--------|--------|--------|-------|--------|
| 4598 | 125723 | Hs.514107      | Chemokine (C-C motif) ligand 3                              | CCL3   | 1.530  | 0.786  | 1.95  | <1E-04 |
| 4636 | 201203 | Hs.464416      | Ubiquitin specific peptidase 14                             | USP14  | 0.393  | 0.132  | 2.99  | <1E-04 |
| 4646 | 210812 | Hs.82028       | Data not found                                              |        | 0.340  | 0.037  | 9.12  | <1E-04 |
| 4708 | 200899 | Hs.558319      | Aldo-keto reductase family 1, member C2                     | AKR1C2 | -0.464 | 0.109  | -4.24 | <1E-04 |
| 4710 | 230419 | Hs.167614      | Data not found                                              |        | -0.026 | 0.286  | -0.09 | <1E-04 |
| 4759 | 418248 | Hs.567512      | Transcribed locus                                           |        | 0.111  | -0.130 | -0.85 | <1E-04 |
| 4772 | 203549 | Hs.553105      | Data not found                                              |        | 0.421  | 0.140  | 3.02  | <1E-04 |
| 4852 | 199716 | Hs.271643      | Data not found                                              |        | 0.190  | -0.031 | -6.18 | <1E-04 |
| 4928 | 294138 | Data not found | Data not found                                              |        | -0.549 | 0.081  | -6.8  | <1E-04 |
| 4978 | 200880 | Hs.558453      | ATP synthase, H <sup>+</sup> transporting, mitochondrial F0 | ATP5L  | 0.169  | 0.027  | 6.33  | <1E-04 |
| 5026 | 252358 | Hs.159971      | Der1-like domain family, member 3                           | DERL3  | 1.674  | 1.318  | 1.27  | <1E-04 |
| 5052 | 230432 | Data not found | Data not found                                              |        | -0.046 | 0.364  | -0.13 | <1E-04 |
| 5120 | 126438 | Data not found | Data not found                                              |        | 0.534  | 0.097  | 5.51  | <1E-04 |
| 5140 | 200826 | Hs.174021      | Data not found                                              |        | 0.019  | 0.266  | 0.07  | <1E-04 |
| 5147 | 120643 | Hs.382306      | Data not found                                              |        | 0.511  | 0.117  | 4.37  | <1E-04 |
| 5208 | 345722 | Hs.491308      | RAB25, member RAS oncogene family                           | RAB25  | -0.368 | -0.027 | 13.41 | <1E-04 |
| 5213 | 206785 | Hs.544913      | Data not found                                              |        | 2.285  | 1.279  | 1.79  | <1E-04 |
| 5234 | 292683 | Hs.543062      | Transcribed locus                                           |        | 0.476  | 0.016  | 29.89 | <1E-04 |
| 5251 | 243956 | Data not found | Data not found                                              |        | -0.268 | 0.493  | -0.54 | <1E-04 |
| 5275 | 199015 | Data not found | Data not found                                              |        | 1.651  | 0.101  | 16.41 | <1E-04 |
| 5336 | 22328  | Hs.512914      | NMDA receptor regulated 1-like                              | NARG1L | 0.775  | 0.275  | 2.81  | <1E-04 |
| 5347 | 197872 | Data not found | Data not found                                              |        | -0.348 | 0.321  | -1.09 | <1E-04 |
| 5360 | 292697 | Hs.370147      | Centrosome and spindle pole associated protein 1            | CSPP1  | -0.870 | -0.062 | 14.07 | <1E-04 |
| 5381 | 120306 | Hs.135087      | In multiple clusters                                        |        | 0.418  | 0.113  | 3.71  | <1E-04 |
| 5411 | 207049 | Hs.496542      | Ring finger protein 128                                     | RNF128 | -0.575 | -0.018 | 31.55 | <1E-04 |
| 5439 | 239596 | Hs.489105      | Data not found                                              |        | 1.873  | 1.128  | 1.66  | <1E-04 |
| 5500 | 200938 | Hs.158209      | 5'-nucleotidase, cytosolic II                               | NT5C2  | 0.505  | 0.164  | 3.08  | <1E-04 |
| 5503 | 247165 | Data not found | Data not found                                              |        | 0.431  | 0.043  | 10.05 | <1E-04 |
| 5531 | 296199 | Hs.423163      | Transcribed locus                                           |        | -0.348 | 0.129  | -2.7  | <1E-04 |
| 5556 | 233564 | Hs.122523      | Data not found                                              |        | 1.898  | 0.496  | 3.83  | <1E-04 |



|      |        |                      |                                                           |          |        |        |         |        |
|------|--------|----------------------|-----------------------------------------------------------|----------|--------|--------|---------|--------|
| 5594 | 295648 | Hs.560983            | Transcribed locus                                         |          | -0.612 | 0.139  | -4.4    | <1E-04 |
| 5610 | 233806 | Hs.440525            | Translocase of inner mitochondrial membrane 9 homolog     | TIMM9    | -0.396 | -0.054 | 7.33    | <1E-04 |
| 5618 | 204722 | Hs.24379             | Trafficking protein particle complex 1                    | TRAPPC1  | 0.264  | -0.418 | -0.63   | <1E-04 |
| 5626 | 200604 | Hs.268787            | Transcribed locus                                         |          | 0.531  | 0.099  | 5.37    | <1E-04 |
| 5711 | 275793 | Hs.58690             | Data not found                                            |          | -0.414 | 0.108  | -3.84   | <1E-04 |
| 5736 | 229405 | In multiple clusters | Transcribed locus                                         |          | -0.074 | 0.639  | -0.12   | <1E-04 |
| 5754 | 214795 | Hs.118161            | Data not found                                            |          | 1.637  | 1.279  | 1.28    | <1E-04 |
| 5761 | 198780 | Hs.368226            | Data not found                                            |          | 1.530  | 0.134  | 11.4    | <1E-04 |
| 5806 | 200204 | Hs.200770            | Data not found                                            |          | -0.341 | 0.087  | -3.92   | <1E-04 |
| 5810 | 292748 | Hs.488051            | CSRP2 binding protein                                     | CSRP2BP  | -0.612 | 0.238  | -2.57   | <1E-04 |
| 5828 | 292391 | Hs.536275            | Transcribed locus                                         |          | -0.464 | 0.159  | -2.92   | <1E-04 |
| 5863 | 245787 | Hs.187376            | Intraflagellar transport 88 homolog (Chlamydomonas)       | IFT88    | -0.655 | -0.003 | 252.71  | <1E-04 |
| 5878 | 201365 | Data not found       | Data not found                                            |          | 0.339  | 0.068  | 5       | <1E-04 |
| 5887 | 202531 | Hs.212088            | Epoxide hydrolase 2, cytoplasmic                          | EPHX2    | 0.651  | -0.002 | -283.42 | <1E-04 |
| 5901 | 416001 | Hs.163042            | Transcribed locus                                         |          | -0.236 | 0.161  | -1.47   | <1E-04 |
| 5955 | 415621 | Hs.71465             | In multiple clusters                                      |          | -0.594 | 0.118  | -5.02   | <1E-04 |
| 5961 | 239922 | Hs.112877            | Transcribed locus                                         |          | -0.429 | 0.219  | -1.96   | <1E-04 |
| 5964 | 416727 | Hs.58871             | Transcribed locus                                         |          | -0.507 | 0.165  | -3.06   | <1E-04 |
| 5989 | 245125 | Hs.458609            | Transcribed locus                                         |          | -0.177 | 0.067  | -2.64   | <1E-04 |
| 6009 | 416440 | Data not found       | Data not found                                            |          | -0.796 | -0.064 | 12.35   | <1E-04 |
| 6031 | 203389 | Hs.102408            | Homo sapiens, clone IMAGE:5207242, mRNA                   |          | -0.213 | 0.142  | -1.5    | <1E-04 |
| 6044 | 296205 | Hs.118161            | Chromosome 10 open reading frame 11                       | C10orf11 | -0.697 | 0.256  | -2.72   | <1E-04 |
| 6056 | 110425 | Hs.472038            | UTP11-like, U3 small nucleolar ribonucleoprotein, (yeast) | UTP11L   | -0.109 | -0.704 | 0.15    | <1E-04 |
| 6123 | 213679 | Hs.443875            | DCP2 decapping enzyme homolog (S. cerevisiae)             | DCP2     | 1.359  | 0.139  | 9.8     | <1E-04 |
| 6229 | 199537 | In multiple clusters | In multiple clusters                                      |          | -0.770 | -0.275 | 2.8     | <1E-04 |
| 6257 | 205647 | Hs.176503            | TBC1 domain family, member 1                              | TBC1D1   | -0.270 | 0.057  | -4.73   | <1E-04 |
| 6265 | 202704 | Hs.109655            | CDNA FLJ37623 fis, clone BRCOC2014013                     |          | 0.640  | 0.109  | 5.86    | <1E-04 |
| 6341 | 297416 | Hs.193792            | Transcribed locus                                         |          | -0.260 | 0.345  | -0.75   | <1E-04 |
| 6382 | 201611 | Hs.488293            | Data not found                                            |          | -0.716 | -0.137 | 5.21    | <1E-04 |
| 6391 | 203390 | Data not found       | Data not found                                            |          | 1.180  | 0.264  | 4.47    | <1E-04 |

|      |        |                |                                                     |          |        |        |        |        |
|------|--------|----------------|-----------------------------------------------------|----------|--------|--------|--------|--------|
| 6397 | 22034  | Hs.469331      | START domain containing 7                           | STARD7   | 0.307  | -0.256 | -1.2   | <1E-04 |
| 6398 | 127982 | Hs.491582      | Plasminogen activator, tissue                       | PLAT     | 1.335  | -0.395 | -3.38  | <1E-04 |
| 6409 | 202168 | Hs.445981      | Data not found                                      |          | -0.228 | 0.252  | -0.9   | <1E-04 |
| 6464 | 210952 | Hs.504517      | Data not found                                      |          | 0.227  | -0.152 | -1.49  | <1E-04 |
| 6515 | 113522 | Hs.484551      | Carboxypeptidase M                                  | CPM      | 0.747  | 0.002  | 417.02 | <1E-04 |
| 6540 | 345439 | Data not found | Deoxyribonuclease II, lysosomal                     | DNASE2   | 0.534  | 0.100  | 5.32   | <1E-04 |
| 6546 | 229945 | Hs.558442      | Programmed cell death 6 interacting protein         | PDCD6IP  | 0.059  | -0.212 | -0.28  | <1E-04 |
| 6564 | 229924 | Hs.519583      | Transcribed locus                                   |          | 0.520  | 0.046  | 11.35  | <1E-04 |
| 6569 | 113529 | Hs.189073      | In multiple clusters                                |          | 0.407  | -0.057 | -7.08  | <1E-04 |
| 6583 | 243322 | Hs.437966      | Transcribed locus                                   |          | -0.808 | -0.233 | 3.47   | <1E-04 |
| 6598 | 200626 | Hs.398636      | Hemoglobin, alpha 2                                 | HBA2     | -0.470 | 0.104  | -4.53  | <1E-04 |
| 6626 | 205127 | Hs.480364      | Data not found                                      |          | 0.522  | 0.130  | 4      | <1E-04 |
| 6654 | 229508 | Hs.505824      | Sorting and assembly machinery component 50 homolog | SAMM50   | 0.903  | 0.019  | 47.89  | <1E-04 |
| 6747 | 416066 | Hs.64016       | Data not found                                      |          | 0.886  | -0.701 | -1.26  | <1E-04 |
| 6751 | 202233 | Data not found | Data not found                                      |          | 0.190  | -0.122 | -1.56  | <1E-04 |
| 6756 | 416862 | Hs.202521      | Data not found                                      |          | 0.538  | -0.385 | -1.4   | <1E-04 |
| 6762 | 234072 | Data not found | Data not found                                      |          | 0.070  | -0.582 | -0.12  | <1E-04 |
| 6770 | 209507 | Hs.298658      | Data not found                                      |          | -1.029 | -0.192 | 5.35   | <1E-04 |
| 6788 | 210488 | Hs.439544      | Data not found                                      |          | -0.462 | 0.126  | -3.65  | <1E-04 |
| 6805 | 202236 | Hs.5920        | Glucosamine-2-epimerase/N-acetylmannosamine kinase  | GNE      | 1.432  | -0.375 | -3.81  | <1E-04 |
| 6815 | 207968 | Data not found | Data not found                                      |          | 0.171  | -0.135 | -1.26  | <1E-04 |
| 6820 | 430313 | Hs.379414      | Data not found                                      |          | 1.644  | 0.175  | 9.39   | <1E-04 |
| 6859 | 203010 | Hs.420024      | Data not found                                      |          | 1.256  | -0.063 | -20.08 | <1E-04 |
| 6861 | 234858 | Hs.528833      | Data not found                                      |          | 1.621  | 0.519  | 3.12   | <1E-04 |
| 6862 | 248534 | Hs.554795      | Plexin C1                                           | PLXNC1   | -0.639 | 0.092  | -6.91  | <1E-04 |
| 6882 | 416876 | Hs.509872      | Data not found                                      |          | -0.260 | 0.024  | -10.79 | <1E-04 |
| 6935 | 233738 | Hs.30054       | Coagulation factor V (proaccelerin, labile factor)  | F5       | 0.490  | -0.148 | -3.32  | <1E-04 |
| 6936 | 266409 | Hs.401903      | Cytochrome c oxidase subunit Va                     | COX5A    | 1.197  | -0.073 | -16.42 | <1E-04 |
| 6941 | 136282 | Data not found | Chromosome 16 open reading frame 72                 | C16orf72 | 0.271  | -0.564 | -0.48  | <1E-04 |
| 6943 | 200714 | Hs.421437      | C-type lectin domain family 4, member M             | CLEC4M   | 0.935  | -0.032 | -29.45 | <1E-04 |

|      |        |                      |                                                              |          |        |        |         |        |
|------|--------|----------------------|--------------------------------------------------------------|----------|--------|--------|---------|--------|
| 6945 | 274081 | Hs.408790            | Phosphatidylinositol glycan anchor biosynthesis, class P     | PIGP     | 1.430  | -0.343 | -4.17   | <1E-04 |
| 6952 | 197356 | Hs.534322            | Major histocompatibility complex, class II, DR beta 1        | HLA-DRB1 | 0.558  | -0.425 | -1.31   | <1E-04 |
| 6953 | 240031 | Hs.525557            | Serpin peptidase inhibitor, clade A, member 1                | SERPINA1 | 0.115  | -0.539 | -0.21   | <1E-04 |
| 6963 | 271781 | Hs.442609            | Mitochondrial ribosomal protein L38                          | MRPL38   | -0.136 | -0.657 | 0.21    | <1E-04 |
| 6970 | 197675 | Hs.516578            | In multiple clusters                                         |          | 0.412  | -0.049 | -8.47   | <1E-04 |
| 6972 | 264871 | Hs.220950            | Forkhead box O3                                              | FOXO3    | 0.563  | -0.242 | -2.33   | <1E-04 |
| 6977 | 132752 | Hs.159118            | Adenosylmethionine decarboxylase 1                           | AMD1     | 0.472  | -0.594 | -0.79   | <1E-04 |
| 6979 | 200743 | Hs.80756             | Betaine-homocysteine methyltransferase                       | BHMT     | 0.623  | -0.297 | -2.1    | <1E-04 |
| 6981 | 272913 | In multiple clusters | In multiple clusters                                         |          | 0.054  | -0.756 | -0.07   | <1E-04 |
| 7024 | 198874 | Hs.351335            | Transmembrane protein 143                                    | TMEM143  | 0.947  | -0.191 | -4.97   | <1E-04 |
| 7040 | 42648  | Hs.89643             | Transketolase (Wernicke-Korsakoff syndrome)                  | TKT      | 0.901  | -0.114 | -7.92   | <1E-04 |
| 7058 | 41687  | Hs.473648            | Phosphoribosylglycinamide formyltransferase                  | GART     | 1.243  | -0.078 | -16     | <1E-04 |
| 7067 | 132762 | Hs.197644            | Headcase homolog (Drosophila)                                | HECA     | 0.123  | -0.431 | -0.29   | <1E-04 |
| 7085 | 132378 | Hs.502315            | Pyruvate dehydrogenase complex, component X                  | PDHX     | -0.362 | -0.662 | 0.55    | <1E-04 |
| 7103 | 133173 | Hs.144502            | Phosphatidylinositol-4-phosphate 5-kinase, type II, $\gamma$ | PIP5K2C  | 0.435  | -0.377 | -1.15   | <1E-04 |
| 7129 | 38159  | Hs.131776            | Pyroglutamyl-peptidase I                                     | PGPEP1   | -1.326 | -0.092 | 14.49   | <1E-04 |
| 7131 | 49145  | Hs.529357            | CDNA FLJ13474 fis, clone PLACE1003593                        |          | -0.448 | -0.204 | 2.2     | <1E-04 |
| 7153 | 321774 | Hs.75914             | Transmembrane emp24 domain trafficking protein 2             | TMED2    | 0.554  | -0.728 | -0.76   | <1E-04 |
| 7169 | 259085 | Hs.488478            | Chromosome 7 open reading frame 42                           | C7orf42  | 0.067  | -0.815 | -0.08   | <1E-04 |
| 7190 | 357031 | Hs.437322            | Tumor necrosis factor, alpha-induced protein 6               | TNFAIP6  | 1.427  | -0.360 | -3.96   | <1E-04 |
| 7201 | 38070  | Hs.525391            | Transcribed locus                                            |          | 0.459  | -0.003 | -178.63 | <1E-04 |
| 7202 | 143137 | Hs.520383            | Syntaxin 7                                                   | STX7     | 0.390  | -0.417 | -0.94   | <1E-04 |
| 7223 | 257557 | In multiple clusters | Eukaryotic translation elongation factor 1 beta 2            | EEF1B2   | 0.357  | -0.280 | -1.27   | <1E-04 |
| 7226 | 357394 | Hs.362728            | 15 kDa selenoprotein                                         | sept-15  | -0.133 | -0.663 | 0.2     | <1E-04 |
| 7238 | 143890 | In multiple clusters | T cell receptor alpha locus                                  | TRAc     | 0.553  | -0.546 | -1.01   | <1E-04 |
| 7241 | 256788 | In multiple clusters | In multiple clusters                                         |          | 0.378  | -0.542 | -0.7    | <1E-04 |
| 7259 | 259121 | Hs.249996            | Pleiotropic regulator 1 (PRL1 homolog, Arabidopsis)          | PLRG1    | -0.055 | -0.686 | 0.08    | <1E-04 |
| 7269 | 293558 | Hs.194121            | RNA terminal phosphate cyclase-like 1                        | RCL1     | 1.460  | -0.272 | -5.36   | <1E-04 |
| 7273 | 41475  | Hs.523855            | Syntaxin 12                                                  | STX12    | 1.233  | 0.546  | 2.26    | <1E-04 |
| 7277 | 259097 | Hs.250181            | Golgi reassembly stacking protein 1, 65kDa                   | GORASP1  | 1.146  | -0.430 | -2.67   | <1E-04 |

|      |        |                      |                                                                    |          |        |        |        |        |
|------|--------|----------------------|--------------------------------------------------------------------|----------|--------|--------|--------|--------|
| 7278 | 297680 | Hs.237536            | 5'-nucleotidase, cytosolic III-like                                | NT5C3L   | 2.187  | -0.115 | -18.95 | <1E-04 |
| 7292 | 143147 | Hs.282998            | Ribosomal protein L41                                              | RPL41    | -0.091 | -0.579 | 0.16   | <1E-04 |
| 7295 | 259484 | Hs.83286             | KDEL (Lys-Asp-Glu-Leu) containing 2                                | KDELC2   | 1.081  | -0.407 | -2.65  | <1E-04 |
| 7301 | 136987 | Hs.440544            | Chloride intracellular channel 4                                   | CLIC4    | 1.320  | -0.167 | -7.9   | <1E-04 |
| 7305 | 294132 | Hs.35433             | Data not found                                                     |          | 0.247  | -0.646 | -0.38  | <1E-04 |
| 7324 | 309454 | Hs.466871            | Plasminogen activator, urokinase receptor                          | PLAUR    | -0.194 | -0.640 | 0.3    | <1E-04 |
| 7330 | 229343 | In multiple clusters | Apolipoprotein A-I                                                 | APOA1    | -0.630 | -0.116 | 5.42   | <1E-04 |
| 7339 | 206519 | Hs.541856            | Transcribed locus                                                  |          | -2.748 | -0.479 | 5.73   | <1E-04 |
| 7359 | 273794 | In multiple clusters | In multiple clusters                                               |          | 0.122  | -0.873 | -0.14  | <1E-04 |
| 7368 | 267582 | Hs.468415            | Ras homolog gene family, member Q                                  | RHOQ     | 0.646  | -0.299 | -2.16  | <1E-04 |
| 7377 | 271443 | Hs.503178            | Spectrin, beta, non-erythrocytic 1                                 | SPTBN1   | 0.735  | -0.293 | -2.51  | <1E-04 |
| 7387 | 300641 | Hs.476365            | Sterol carrier protein 2                                           | SCP2     | 0.335  | -0.818 | -0.41  | <1E-04 |
| 7418 | 130933 | Hs.448646            | Ribosomal protein L27a                                             | RPL27A   | 0.082  | -0.714 | -0.12  | <1E-04 |
| 7423 | 299481 | Hs.134859            | V-maf musculoaponeurotic fibrosarcoma oncogene                     | MAF      | 0.154  | -0.512 | -0.3   | <1E-04 |
| 7449 | 277901 | Hs.525146            | Sodium leak channel, non-selective                                 | NALCN    | 0.339  | -0.605 | -0.56  | <1E-04 |
| 7475 | 240351 | Hs.518265            | CDV3 homolog (mouse)                                               | CDV3     | 0.193  | -0.553 | -0.35  | <1E-04 |
| 7495 | 299084 | Hs.308709            | Protein disulfide isomerase family A, member 3                     | PDIA3    | 0.601  | -0.567 | -1.06  | <1E-04 |
| 7531 | 298340 | Hs.517134            | Chromosome 20 open reading frame 43                                | C20orf43 | 0.233  | -0.507 | -0.46  | <1E-04 |
| 7544 | 42344  | Hs.435479            | Protein phosphatase 1H (PP2C domain containing)                    | PPM1H    | 3.744  | 2.679  | 1.4    | <1E-04 |
| 7553 | 133650 | Hs.409412            | Poly (ADP-ribose) polymerase family, member 2                      | PARP2    | 0.671  | -0.374 | -1.8   | <1E-04 |
| 7558 | 305182 | Hs.77961             | Major histocompatibility complex, class I, B                       | HLA-B    | 1.198  | -0.947 | -1.26  | <1E-04 |
| 7574 | 248832 | Data not found       | ATPase, H <sup>+</sup> transporting, lysosomal accessory protein 1 | ATP6AP1  | 0.194  | -0.710 | -0.27  | <1E-04 |
| 7583 | 261856 | Hs.75117             | Interleukin enhancer binding factor 2, 45kDa                       | ILF2     | 0.347  | -0.648 | -0.53  | <1E-04 |
| 7611 | 293820 | Hs.126221            | Transmembrane protein 1                                            | TMEM1    | 0.031  | -0.672 | -0.05  | <1E-04 |
| 7618 | 212695 | Hs.388255            | Chromosome 16 open reading frame 61                                | C16orf61 | 0.567  | -0.309 | -1.83  | <1E-04 |
| 7653 | 49164  | Hs.109225            | Vascular cell adhesion molecule 1                                  | VCAM1    | 0.486  | -1.275 | -0.38  | <1E-04 |
| 7698 | 46388  | Hs.400095            | Heat shock 22kDa protein 8                                         | HSPB8    | 0.101  | -0.569 | -0.18  | <1E-04 |
| 7719 | 291401 | Hs.567441            | Eukaryotic translation initiation factor 4B                        | EIF4B    | 0.721  | -0.584 | -1.23  | <1E-04 |
| 7737 | 292197 | Hs.78592             | Eukaryotic translation initiation factor 2B, subunit 1 alpha, 26   | EIF2B1   | 0.449  | -0.523 | -0.86  | <1E-04 |
| 7784 | 327220 | Hs.180178            | LON peptidase N-terminal domain and ring finger 1                  | LONRF1   | 0.292  | -0.698 | -0.42  | <1E-04 |

|      |        |                      |                                                         |          |        |        |        |        |
|------|--------|----------------------|---------------------------------------------------------|----------|--------|--------|--------|--------|
| 7809 | 271082 | Hs.93780             | Transcribed locus                                       |          | 0.444  | 0.074  | 5.98   | <1E-04 |
| 7827 | 271876 | Hs.489284            | Actin related protein 2/3 complex, subunit 1B, 41kDa    | ARPC1B   | -0.116 | -0.632 | 0.18   | <1E-04 |
| 7836 | 266118 | In multiple clusters | Ribosomal protein S3A                                   | RPS3A    | 0.199  | -0.989 | -0.2   | <1E-04 |
| 7927 | 299200 | Hs.5062              | Tetraspanin 3                                           | TSPAN3   | 0.012  | -0.876 | -0.01  | <1E-04 |
| 7976 | 130882 | Hs.23363             | Phosphoglucomutase 2                                    | PGM2     | -0.157 | -0.490 | 0.32   | <1E-04 |
| 7986 | 160515 | Hs.547222            | CDNA FLJ43454 fis, clone OCBBF2034906                   |          | 1.197  | -0.100 | -12.02 | <1E-04 |
| 8004 | 47803  | Hs.20021             | Vesicle-associated membrane protein 1 (synaptobrevin 1) | VAMP1    | 0.431  | -0.252 | -1.71  | <1E-04 |
| 8025 | 291892 | Hs.490394            | Single-stranded DNA binding protein 1                   | SSBP1    | 0.198  | -0.206 | -0.96  | <1E-04 |
| 8042 | 248066 | Data not found       | Ubiquitin-conjugating enzyme E2D 3                      | UBE2D3   | -0.847 | -0.021 | 41.1   | <1E-04 |
| 8054 | 356722 | Hs.469593            | In multiple clusters                                    |          | 0.178  | -0.093 | -1.91  | <1E-04 |
| 8056 | 34989  | Hs.97858             | Kinesin family member 1B                                | KIF1B    | 0.360  | -0.103 | -3.5   | <1E-04 |
| 8059 | 205807 | Hs.509909            | Numb homolog (Drosophila)                               | NUMB     | 0.449  | -0.378 | -1.19  | <1E-04 |
| 8071 | 320241 | Hs.242458            | Spastic paraplegia 21                                   | SPG21    | 0.150  | -0.519 | -0.29  | <1E-04 |
| 8072 | 347531 | Hs.50550             | Kelch repeat and BTB (POZ) domain containing 10         | KBTBD10  | 0.229  | -0.490 | -0.47  | <1E-04 |
| 8081 | 344815 | Hs.278426            | PDGFA associated protein 1                              | PDAP1    | 0.488  | -0.392 | -1.24  | <1E-04 |
| 8088 | 296424 | Hs.234642            | Aquaporin 3 (Gill blood group)                          | AQP3     | 0.286  | -0.018 | -16.02 | <1E-04 |
| 8095 | 210317 | Hs.433888            | RAB11B, member RAS oncogene family                      | RAB11B   | 1.362  | 0.225  | 6.06   | <1E-04 |
| 8097 | 291059 | Hs.505545            | Solute carrier family 11, member 2                      | SLC11A2  | 0.508  | -0.029 | -17.71 | <1E-04 |
| 8112 | 44699  | Hs.7476              | ATPase, H <sup>+</sup> transporting, V0 subunit b       | ATP6V0B  | 0.200  | -0.499 | -0.4   | <1E-04 |
| 8113 | 212468 | Hs.127897            | Data not found                                          |          | -0.664 | -0.178 | 3.74   | <1E-04 |
| 8114 | 248848 | Hs.75160             | Phosphofructokinase, muscle                             | PFKM     | -0.872 | -0.320 | 2.72   | <1E-04 |
| 8117 | 344461 | Hs.522500            | KIAA0310                                                | KIAA0310 | -0.763 | -0.083 | 9.22   | <1E-04 |
| 8129 | 139166 | Hs.235390            | Zinc finger and SCAN domain containing 18               | ZSCAN18  | 0.563  | -0.348 | -1.62  | <1E-04 |
| 8150 | 247697 | Hs.334518            | Zinc finger protein 607                                 | ZNF607   | -0.023 | -0.623 | 0.04   | <1E-04 |
| 8159 | 261499 | In multiple clusters | Ferritin, heavy polypeptide 1                           | FTH1     | -0.066 | -0.926 | 0.07   | <1E-04 |
| 8160 | 297645 | Hs.75535             | Myosin, light chain 2, regulatory, cardiac, slow        | MYL2     | 0.748  | -0.242 | -3.09  | <1E-04 |
| 8168 | 248059 | Hs.420257            | Inter-alpha (globulin) inhibitor H1                     | ITIH1    | 0.219  | -0.641 | -0.34  | <1E-04 |
| 8184 | 46405  | Hs.307924            | Male-specific lethal 3-like 1 (Drosophila)              | MSL3L1   | 1.614  | 0.517  | 3.12   | <1E-04 |
| 8193 | 191881 | Hs.347270            | Major histocompatibility complex, class II, DP alpha 1  | HLA-DPA1 | 0.601  | -0.657 | -0.91  | <1E-04 |
| 8202 | 45877  | Hs.4302              | Solute carrier family 29, member 4                      | SLC29A4  | 0.466  | -0.497 | -0.94  | <1E-04 |

|      |        |                      |                                                        |          |        |        |        |        |
|------|--------|----------------------|--------------------------------------------------------|----------|--------|--------|--------|--------|
| 8216 | 327232 | Hs.523185            | Ribosomal protein L13a                                 | RPL13A   | -0.023 | -0.696 | 0.03   | <1E-04 |
| 8234 | 323977 | Hs.375129            | In multiple clusters                                   |          | 1.705  | -0.828 | -2.06  | <1E-04 |
| 8251 | 298757 | Hs.312485            | Complement factor I                                    | CFI      | 0.007  | -1.187 | -0.01  | <1E-04 |
| 8264 | 131377 | Hs.518123            | TRK-fused gene                                         | TFG      | -0.428 | -0.071 | 6.03   | <1E-04 |
| 8266 | 198208 | Hs.476319            | Enoyl Coenzyme A hydratase domain containing 2         | ECHDC2   | -0.137 | -0.322 | 0.43   | <1E-04 |
| 8284 | 197421 | In multiple clusters | In multiple clusters                                   |          | 0.491  | -0.263 | -1.87  | <1E-04 |
| 8293 | 204339 | Hs.256022            | RAR-related orphan receptor C                          | RORC     | 0.605  | -0.409 | -1.48  | <1E-04 |
| 8317 | 25718  | Hs.435556            | In multiple clusters                                   |          | 0.583  | 0.146  | 3.99   | <1E-04 |
| 8318 | 42365  | Hs.513043            | IMP3, U3 small nucleolar ribonucleoprotein, homolog    | IMP3     | 0.409  | -0.549 | -0.74  | <1E-04 |
| 8336 | 131376 | Hs.239666            | Core 1 synthase, glycoprotein-N-acetylgalactosamine 1  | C1GALT1  | 0.525  | -0.515 | -1.02  | <1E-04 |
| 8345 | 135976 | Hs.24719             | Modulator of apoptosis 1                               | MOAP1    | 0.259  | -0.187 | -1.39  | <1E-04 |
| 8372 | 131779 | Hs.77961             | In multiple clusters                                   |          | 0.363  | -0.339 | -1.07  | <1E-04 |
| 8411 | 236207 | Hs.406134            | Data not found                                         |          | 0.133  | -0.129 | -1.03  | <1E-04 |
| 8417 | 135187 | Hs.504003            | Beta-site APP-cleaving enzyme 1                        | BACE1    | 0.485  | -0.514 | -0.94  | <1E-04 |
| 8421 | 275796 | Hs.444213            | Transducin-like enhancer of split 4                    | TLE4     | 0.416  | -0.128 | -3.25  | <1E-04 |
| 8440 | 308473 | Hs.439552            | Eukaryotic translation elongation factor 1 alpha 1     | EEF1A1   | 0.203  | -0.935 | -0.22  | <1E-04 |
| 8490 | 47454  | Hs.188757            | Potassium channel tetramerisation domain containing 20 | KCTD20   | 0.388  | 0.026  | 14.93  | <1E-04 |
| 8494 | 309585 | Hs.221127            | Solute carrier family 39, member 11                    | SLC39A11 | -0.178 | -0.660 | 0.27   | <1E-04 |
| 8501 | 263899 | Hs.522584            | Thymosin, beta 4, X-linked                             | TMSB4X   | 0.490  | -0.614 | -0.8   | <1E-04 |
| 8503 | 320696 | In multiple clusters | Trophoblast-derived noncoding RNA                      | TncRNA   | 1.046  | -0.739 | -1.42  | <1E-04 |
| 8504 | 357775 | Hs.438863            | Nuclear receptor subfamily 1, group H, member 3        | NR1H3    | 0.848  | -0.777 | -1.09  | <1E-04 |
| 8521 | 320699 | Hs.372286            | Cullin 3                                               | CUL3     | -0.070 | -0.629 | 0.11   | <1E-04 |
| 8536 | 230049 | Hs.506908            | Arylacetamide deacetylase (esterase)                   | AADAC    | 0.111  | -0.334 | -0.33  | <1E-04 |
| 8552 | 142791 | Hs.524910            | Ferritin, heavy polypeptide 1                          | FTH1     | 0.428  | -0.394 | -1.09  | <1E-04 |
| 8561 | 140162 | Hs.72071             | Potassium channel tetramerisation domain containing 9  | KCTD9    | 0.905  | -0.064 | -14.04 | <1E-04 |
| 8566 | 309938 | Hs.83169             | Matrix metalloproteinase 1 (interstitial collagenase)  | MMP1     | 0.462  | -0.662 | -0.7   | <1E-04 |
| 8575 | 321906 | In multiple clusters | Eukaryotic translation elongation factor 1 alpha 1     | EEF1A1   | 0.526  | -0.716 | -0.73  | <1E-04 |
| 8583 | 293879 | Hs.470588            | Karyopherin alpha 6 (importin alpha 7)                 | KPNA6    | 0.562  | -0.440 | -1.28  | <1E-04 |
| 8584 | 310535 | Hs.558335            | Glutathione S-transferase theta 1                      | GSTT1    | 0.360  | -0.568 | -0.63  | <1E-04 |
| 8587 | 38862  | Hs.503709            | Transmembrane protein 123                              | TMEM123  | 0.300  | -0.396 | -0.76  | <1E-04 |

|      |        |                      |                                                   |         |        |        |       |        |
|------|--------|----------------------|---------------------------------------------------|---------|--------|--------|-------|--------|
| 8593 | 320299 | Hs.9527              | Chromosome 2 open reading frame 28                | C2orf28 | 0.236  | -0.626 | -0.38 | <1E-04 |
| 8611 | 322241 | In multiple clusters | In multiple clusters                              |         | 0.446  | -0.747 | -0.6  | <1E-04 |
| 8627 | 264214 | Hs.408528            | Retinoblastoma 1 (including osteosarcoma)         | RB1     | -0.019 | -0.385 | 0.05  | <1E-04 |
| 8633 | 139222 | Hs.205163            | Mitochondrial ribosomal protein L3                | MRPL3   | 0.469  | -0.080 | -5.9  | <1E-04 |
| 8656 | 305814 | Hs.194718            | Zinc finger, RAN-binding domain containing 2      | ZRANB2  | 0.298  | -0.633 | -0.47 | <1E-04 |
| 8674 | 301899 | Hs.79110             | Nucleolin                                         | NCL     | 0.048  | -0.748 | -0.06 | <1E-04 |
| 8692 | 301902 | Hs.469944            | CDNA FLJ23679 fis, clone HEP09084                 |         | 0.272  | -0.552 | -0.49 | <1E-04 |
| 8698 | 197760 | Hs.356331            | Peptidylprolyl isomerase A (cyclophilin A)        | PPIA    | 0.156  | -0.672 | -0.23 | <1E-04 |
| 8699 | 233550 | Hs.505934            | In multiple clusters                              |         | 0.369  | -0.282 | -1.31 | <1E-04 |
| 8701 | 300104 | Hs.534168            | NADH dehydrogenase 1 alpha subcomplex, 1, 7.5kDa  | NDUFA1  | 0.595  | -0.730 | -0.81 | <1E-04 |
| 8717 | 239703 | Hs.436911            | Alpha-1-microglobulin/bikunin precursor           | AMBP    | 0.226  | -0.499 | -0.45 | <1E-04 |
| 8726 | 246293 | Hs.405880            | Mitochondrial ribosomal protein S21               | MRPS21  | 0.039  | -0.596 | -0.07 | <1E-04 |
| 8746 | 306181 | Hs.534125            | Major histocompatibility complex, class I, B      | HLA-B   | 0.598  | -0.624 | -0.96 | <1E-04 |
| 8755 | 299604 | Hs.432387            | In multiple clusters                              |         | 0.043  | -0.640 | -0.07 | <1E-04 |
| 8765 | 341101 | Hs.180877            | In multiple clusters                              |         | 0.580  | -0.656 | -0.88 | <1E-04 |
| 8782 | 306538 | Hs.558521            | Chromosome 2 open reading frame 33                | C2orf33 | 0.188  | -0.548 | -0.34 | <1E-04 |
| 8825 | 241297 | Hs.515016            | Melanoma associated antigen (mutated) 1           | MUM1    | 0.870  | -0.244 | -3.57 | <1E-04 |
| 8849 | 134349 | Hs.24485             | Structural maintenance of chromosomes 3           | SMC3    | 1.100  | -0.197 | -5.59 | <1E-04 |
| 8852 | 244367 | Hs.118118            | Tetraspanin 5                                     | TSPAN5  | 0.072  | -0.363 | -0.2  | <1E-04 |
| 8858 | 142920 | In multiple clusters | In multiple clusters                              |         | 0.107  | -1.046 | -0.1  | <1E-04 |
| 8873 | 345360 | Hs.456465            | In multiple clusters                              |         | 0.443  | -0.050 | -8.81 | <1E-04 |
| 8881 | 310755 | Hs.502829            | Splicing factor 1                                 | SF1     | 0.685  | -0.380 | -1.8  | <1E-04 |
| 8924 | 249650 | Hs.35052             | Testis enhanced gene transcript (BAX inhibitor 1) | TEGT    | 0.175  | -0.570 | -0.31 | <1E-04 |
| 8943 | 292401 | Data not found       | MRNA; cDNA DKFZp781B2436                          |         | 0.327  | -0.692 | -0.47 | <1E-04 |
| 8971 | 321950 | Hs.514581            | Actin, gamma 1                                    | ACTG1   | 1.093  | -0.539 | -2.03 | <1E-04 |
| 8978 | 249366 | Hs.78466             | Proteasome 26S subunit, non-ATPase, 8             | PSMD8   | -0.107 | -0.506 | 0.21  | <1E-04 |
| 9024 | 296601 | Hs.504641            | CD163 molecule                                    | CD163   | 0.203  | -0.745 | -0.27 | <1E-04 |
| 9031 | 208987 | Hs.370668            | SEC14 and spectrin domains 1                      | SESTD1  | -0.143 | 0.230  | -0.62 | <1E-04 |
| 9042 | 298089 | Hs.29978             | Frataxin                                          | FXN     | 0.300  | -0.239 | -1.26 | <1E-04 |
| 9047 | 140063 | Hs.520210            | Full-length cDNA clone CS0DC014YA20               |         | 0.193  | -0.411 | -0.47 | <1E-04 |

|      |        |                      |                                                          |           |        |        |       |        |
|------|--------|----------------------|----------------------------------------------------------|-----------|--------|--------|-------|--------|
| 9051 | 291549 | Hs.432424            | Tripeptidyl peptidase II                                 | TPP2      | 0.449  | -0.107 | -4.22 | <1E-04 |
| 9052 | 308915 | Hs.432485            | Similar to large subunit ribosomal protein L36a          | LOC729362 | 0.233  | -0.337 | -0.69 | <1E-04 |
| 9065 | 139270 | Hs.102471            | Phosphatase and actin regulator 2                        | PHACTR2   | 1.820  | 0.242  | 7.51  | <1E-04 |
| 9067 | 211847 | Hs.171802            | Ring finger protein 149                                  | RNF149    | 1.784  | 0.668  | 2.67  | <1E-04 |
| 9078 | 270128 | Hs.260603            | Phosphatidylinositol-4-phosphate 5-kinase, type II, beta | PIP5K2B   | 1.432  | 0.519  | 2.76  | <1E-04 |
| 9080 | 325080 | Hs.494691            | Profilin 1                                               | PFN1      | 0.625  | -0.238 | -2.63 | <1E-04 |
| 9147 | 147590 | Hs.238990            | Cyclin-dependent kinase inhibitor 1B (p27, Kip1)         | CDKN1B    | 0.393  | -0.115 | -3.41 | <1E-04 |
| 9149 | 233241 | Hs.124147            | F-box and leucine-rich repeat protein 11                 | FBXL11    | -0.021 | -0.417 | 0.05  | <1E-04 |
| 9204 | 269007 | Hs.231029            | Hypothetical protein MGC14327                            | MGC14327  | 0.111  | -0.021 | -5.27 | <1E-04 |
| 9230 | 244774 | Hs.471851            | High density lipoprotein binding protein (vigilin)       | HDLBP     | -0.429 | 0.005  | -82.6 | <1E-04 |
| 9254 | 38025  | Hs.369052            | In multiple clusters                                     |           | 0.251  | -0.687 | -0.37 | <1E-04 |
| 9263 | 135813 | Hs.522632            | TIMP metalloproteinase inhibitor 1                       | TIMP1     | 0.192  | -0.812 | -0.24 | <1E-04 |
| 9268 | 301988 | Hs.373763            | Heterogeneous nuclear ribonucleoprotein R                | HNRPR     | 0.040  | -0.509 | -0.08 | <1E-04 |
| 9281 | 136462 | Hs.533262            | Anaphase promoting complex subunit 2                     | ANAPC2    | 0.280  | -0.482 | -0.58 | <1E-04 |
| 9284 | 242806 | Hs.513578            | Adenylate cyclase 7                                      | ADCY7     | 0.779  | -0.422 | -1.85 | <1E-04 |
| 9299 | 140377 | Hs.327736            | Kinesin family member 5B                                 | KIF5B     | 0.384  | -0.039 | -9.82 | <1E-04 |
| 9304 | 308545 | In multiple clusters | In multiple clusters                                     |           | -0.021 | -0.861 | 0.02  | <1E-04 |
| 9321 | 292036 | Hs.516837            | Smg-5 homolog, nonsense mediated mRNA decay factor       | SMG5      | 0.752  | -0.227 | -3.31 | <1E-04 |
| 9335 | 137236 | Hs.508010            | Fibronectin type III domain containing 3A                | FNDC3A    | 0.047  | -0.403 | -0.12 | <1E-04 |
| 9365 | 262407 | Hs.435771            | Apoptosis inhibitor 5                                    | API5      | -0.001 | -0.915 | 0     | <1E-04 |
| 9384 | 295067 | Hs.73965             | Splicing factor, arginine/serine-rich 2                  | SFRS2     | 0.290  | -0.471 | -0.62 | <1E-04 |
| 9385 | 322984 | Hs.412842            | Cell division cycle 123 homolog (S. cerevisiae)          | CDC123    | 0.274  | -0.373 | -0.74 | <1E-04 |
| 9392 | 253258 | Hs.128556            | Dentin matrix acidic phosphoprotein                      | DMP1      | 0.678  | -0.655 | -1.03 | <1E-04 |
| 9401 | 262433 | Hs.532411            | Lysosomal trafficking regulator                          | LYST      | 0.400  | -0.623 | -0.64 | <1E-04 |
| 9403 | 321230 | Data not found       | Major histocompatibility complex, class II, DR beta 1    | HLA-DRB1  | 1.132  | -0.518 | -2.18 | <1E-04 |
| 9420 | 297010 | In multiple clusters | In multiple clusters                                     |           | 0.018  | -0.778 | -0.02 | <1E-04 |
| 9421 | 320774 | In multiple clusters | In multiple clusters                                     |           | -0.084 | -0.773 | 0.11  | <1E-04 |
| 9430 | 308901 | Hs.90061             | Progesterone receptor membrane component 1               | PGRMC1    | 0.111  | -0.421 | -0.26 | <1E-04 |
| 9479 | 139888 | In multiple clusters | Enoyl Coenzyme A hydratase domain containing 1           | ECHDC1    | -0.171 | -0.686 | 0.25  | <1E-04 |
| 9484 | 307365 | Hs.512934            | General transcription factor IIA, 2, 12kDa               | GTF2A2    | 0.080  | -0.284 | -0.28 | <1E-04 |



|      |        |                      |                                                        |           |        |        |        |        |
|------|--------|----------------------|--------------------------------------------------------|-----------|--------|--------|--------|--------|
| 9488 | 145727 | Hs.464071            | Phosphogluconate dehydrogenase                         | PGD       | 0.099  | -0.371 | -0.27  | <1E-04 |
| 9497 | 139169 | Hs.536655            | CDNA clone IMAGE:5299642                               |           | 1.237  | -0.150 | -8.24  | <1E-04 |
| 9512 | 338477 | Hs.501140            | KIAA1598                                               | KIAA1598  | 0.369  | -0.138 | -2.67  | <1E-04 |
| 9525 | 149334 | Hs.28491             | Spermidine/spermine N1-acetyltransferase 1             | SAT1      | 0.006  | -0.722 | -0.01  | <1E-04 |
| 9574 | 301614 | Hs.37558             | Riboflavin kinase                                      | RFK       | 0.774  | -0.579 | -1.34  | <1E-04 |
| 9591 | 290622 | Hs.461379            | GABA(A) receptor-associated protein-like 2             | GABARAPL2 | 0.081  | -0.853 | -0.09  | <1E-04 |
| 9608 | 245549 | Hs.282331            | Sirtuin 5 ( <i>S. cerevisiae</i> )                     | SIRT5     | 0.033  | -0.620 | -0.05  | <1E-04 |
| 9610 | 301642 | Hs.479396            | Full length insert cDNA clone YY93G09                  |           | 0.139  | -0.556 | -0.25  | <1E-04 |
| 9617 | 240846 | Hs.520640            | Full-length cDNA clone CS0DF034YA13                    |           | 0.371  | -0.541 | -0.69  | <1E-04 |
| 9637 | 301429 | Hs.20716             | Translocase of inner mitochondrial membrane 17A        | TIMM17A   | 0.891  | -0.266 | -3.35  | <1E-04 |
| 9646 | 305873 | Hs.534255            | Beta-2-microglobulin                                   | B2M       | 1.021  | -0.901 | -1.13  | <1E-04 |
| 9671 | 233274 | Hs.64691             | F-box protein 28                                       | FBXO28    | 2.996  | 1.219  | 2.46   | <1E-04 |
| 9672 | 270863 | Hs.369453            | defective in cullin neddylation 1, domain containing 2 | DCUN1D2   | -0.228 | 0.078  | -2.94  | <1E-04 |
| 9682 | 302012 | In multiple clusters | Major histocompatibility complex, class I, A           | HLA-A     | 0.494  | -0.331 | -1.49  | <1E-04 |
| 9705 | 146879 | Hs.519601            | , dominant negative helix-loop-helix protein           | ID4       | 1.314  | 0.593  | 2.22   | <1E-04 |
| 9724 | 229809 | Hs.404056            | Data not found                                         |           | 0.422  | 0.078  | 5.4    | <1E-04 |
| 9753 | 293640 | Hs.132225            | Phosphoinositide-3-kinase, regulatory subunit 1        | PIK3R1    | 0.935  | -0.719 | -1.3   | <1E-04 |
| 9762 | 297048 | Hs.68714             | Splicing factor, arginine/serine-rich 1                | SFRS1     | 0.345  | -0.645 | -0.54  | <1E-04 |
| 9763 | 321652 | Hs.355983            | Basic leucine zipper and W2 domains 1                  | BZW1      | 0.632  | -0.611 | -1.03  | <1E-04 |
| 9771 | 292802 | Hs.520898            | Cathepsin B                                            | CTSB      | 0.488  | -0.966 | -0.5   | <1E-04 |
| 9772 | 310464 | Hs.522110            | CAMP responsive element binding protein 3              | CREB3     | 1.804  | 0.687  | 2.63   | <1E-04 |
| 9778 | 219847 | Hs.522493            | Calmodulin regulated spectrin-associated protein 1     | CAMSAP1   | 1.467  | 0.129  | 11.33  | <1E-04 |
| 9781 | 321590 | Hs.499891            | Heterogeneous nuclear ribonucleoprotein H3 (2H9)       | HNRPH3    | 0.727  | -0.679 | -1.07  | <1E-04 |
| 9784 | 34349  | Hs.356285            | High-mobility group nucleosome binding domain 1        | HMGN1     | 0.359  | -0.410 | -0.88  | <1E-04 |
| 9814 | 214066 | Hs.324746            | Alpha-2-HS-glycoprotein                                | AHSG      | 0.067  | -0.355 | -0.19  | <1E-04 |
| 9817 | 320842 | Hs.314359            | Eukaryotic translation initiation factor 3, subunit 12 | EIF3S12   | 0.119  | -0.532 | -0.22  | <1E-04 |
| 9824 | 246706 | Hs.374596            | Tumor protein, translationally-controlled 1            | TPT1      | 0.284  | -0.741 | -0.38  | <1E-04 |
| 9826 | 309203 | Hs.474010            | Pituitary tumor-transforming 1 interacting protein     | PTTG1IP   | 0.335  | -0.723 | -0.46  | <1E-04 |
| 9842 | 248244 | In multiple clusters | In multiple clusters                                   |           | 0.321  | -0.343 | -0.94  | <1E-04 |
| 9853 | 320847 | In multiple clusters | In multiple clusters                                   |           | 1.496  | -0.138 | -10.81 | <1E-04 |

|       |         |                      |                                                        |           |        |        |        |        |
|-------|---------|----------------------|--------------------------------------------------------|-----------|--------|--------|--------|--------|
| 9863  | 346544  | Hs.204044            | Data not found                                         |           | 0.301  | -0.153 | -1.96  | <1E-04 |
| 9907  | 322771  | Hs.78524             | Prune homolog (Drosophila)                             | PRUNE     | 0.550  | -0.404 | -1.36  | <1E-04 |
| 9942  | 266328  | Hs.505104            | Kelch domain containing 5                              | KLHDC5    | 0.696  | -0.158 | -4.41  | <1E-04 |
| 9960  | 266353  | Hs.78989             | Alcohol dehydrogenase 5 (class III), chi polypeptide   | ADH5      | 0.173  | -0.401 | -0.43  | <1E-04 |
| 9998  | 323166  | Hs.464472            | Myosin regulatory light chain MRLC2                    | MRLC2     | 0.211  | -0.631 | -0.33  | <1E-04 |
| 10022 | 245978  | Hs.172685            | Exportin 7                                             | XPO7      | 0.186  | -0.472 | -0.39  | <1E-04 |
| 10033 | 301106  | Hs.347524            | Chromosome 16 open reading frame 75                    | C16orf75  | 0.366  | -0.333 | -1.1   | <1E-04 |
| 10042 | 305895  | Hs.180171            | CDNA FLJ10417 fis, clone NT2RP1000112                  |           | 0.621  | -0.258 | -2.41  | <1E-04 |
| 10101 | 148403  | Hs.398636            | In multiple clusters                                   |           | 0.303  | 0.018  | 16.71  | <1E-04 |
| 10119 | 149132  | Hs.518326            | In multiple clusters                                   |           | 0.383  | -0.262 | -1.46  | <1E-04 |
| 10137 | 146926  | Hs.433300            | Fc fragment of IgE, receptor for; $\gamma$ polypeptide | FCER1G    | 0.769  | -0.244 | -3.15  | <1E-04 |
| 10148 | 245614  | Hs.181301            | Cathepsin S                                            | CTSS      | 0.642  | -0.188 | -3.42  | <1E-04 |
| 10149 | 271726  | Hs.200668            | Ceramide kinase                                        | CERK      | 0.841  | 0.158  | 5.33   | <1E-04 |
| 10167 | 291288  | Hs.503251            | In multiple clusters                                   |           | 1.313  | -0.050 | -26.42 | <1E-04 |
| 10175 | 264558  | In multiple clusters | Lactate dehydrogenase B                                | LDHB      | 0.397  | -0.840 | -0.47  | <1E-04 |
| 10176 | 297050  | Hs.458986            | Data not found                                         |           | 1.852  | -0.096 | -19.3  | <1E-04 |
| 10185 | 294218  | Hs.224171            | Enolase 3 (beta, muscle)                               | ENO3      | 0.515  | -0.552 | -0.93  | <1E-04 |
| 10193 | 262146  | In multiple clusters | In multiple clusters                                   |           | 0.232  | -0.753 | -0.31  | <1E-04 |
| 10199 | 136924  | Hs.1063              | Small nuclear ribonucleoprotein polypeptide C          | SNRPC     | 0.221  | -0.377 | -0.59  | <1E-04 |
| 10200 | 48070   | Hs.269528            | N-acetyltransferase 13                                 | NAT13     | 0.119  | -0.245 | -0.49  | <1E-04 |
| 10254 | 48162   | Hs.289293            | Chromosome 8 open reading frame 42                     | C8orf42   | 1.481  | -0.322 | -4.6   | <1E-04 |
| 10265 | 258685  | Hs.271643            | LMBR1 domain containing 1                              | LMBRD1    | 0.210  | -0.309 | -0.68  | <1E-04 |
| 10313 | 347371  | In multiple clusters | Ribosomal protein L41                                  | RPL41     | 0.024  | -0.825 | -0.03  | <1E-04 |
| 10333 | 37303   | Hs.473761            | Reticulon 3                                            | RTN3      | -0.556 | 0.083  | -6.69  | <1E-04 |
| 10344 | 48411   | Hs.446271            | Hypothetical gene supported by AK091718                | LOC401504 | 0.743  | 0.184  | 4.04   | <1E-04 |
| 10362 | 48413   | Hs.386294            | Zinc finger protein 195                                | ZNF195    | 2.369  | 2.722  | 0.87   | <1E-04 |
| 10378 | 416017  | Hs.509523            | Data not found                                         |           | -0.419 | 0.200  | -2.09  | <1E-04 |
| 10414 | 376584  | Hs.108080            | Cysteine and glycine-rich protein 1                    | CSRP1     | -0.678 | -0.033 | 20.73  | <1E-04 |
| 10428 | 1673750 | Hs.469879            | Data not found                                         |           | 2.040  | 0.263  | 7.75   | <1E-04 |
| 10435 | 754835  | Hs.98367             | SRY (sex determining region Y)-box 17                  | SOX17     | 2.278  | 1.427  | 1.6    | <1E-04 |

|       |         |                      |                                                        |           |        |        |        |        |
|-------|---------|----------------------|--------------------------------------------------------|-----------|--------|--------|--------|--------|
| 10464 | 1673907 | Hs.46319             | Sex hormone-binding globulin                           | SHBG      | 1.724  | 0.092  | 18.67  | <1E-04 |
| 10473 | 125145  | Hs.163079            | Tubulin, alpha-like 3                                  | TUBAL3    | 1.227  | 0.230  | 5.33   | <1E-04 |
| 10526 | 788248  | Hs.28309             | In multiple clusters                                   |           | -0.648 | 0.084  | -7.69  | <1E-04 |
| 10556 | 234920  | In multiple clusters | In multiple clusters                                   |           | -1.675 | -0.058 | 29.13  | <1E-04 |
| 10583 | 1436996 | Data not found       | Data not found                                         |           | -1.154 | 1.367  | -0.84  | <1E-04 |
| 10594 | 416976  | Hs.145384            | Glycine-N-acyltransferase                              | GLYAT     | -0.673 | -0.047 | 14.29  | <1E-04 |
| 10603 | 452306  | Hs.511367            | Data not found                                         |           | -0.664 | 0.071  | -9.4   | <1E-04 |
| 10615 | 757922  | Hs.532626            | Chromosome 14 open reading frame 179                   | C14orf179 | 0.281  | -0.355 | -0.79  | <1E-04 |
| 10618 | 1714994 | Hs.523036            | PQ loop repeat containing 2                            | PQLC2     | -0.472 | 0.006  | -85.31 | <1E-04 |
| 10619 | 2229759 | Hs.88139             | Phosphoribosylformylglycinamide synthase               | PFAS      | -0.944 | -0.113 | 8.34   | <1E-04 |
| 10642 | 774069  | Hs.129634            | Cyclin-dependent kinase 2-interacting protein          | CINP      | 0.345  | -0.125 | -2.75  | <1E-04 |
| 10662 | 249150  | Hs.16064             | CNKSR family member 3                                  | CNKSR3    | -0.258 | 0.368  | -0.7   | <1E-04 |
| 10673 | 2260357 | Hs.415336            | Transcribed locus                                      |           | -1.477 | 0.072  | -20.48 | <1E-04 |
| 10698 | 247281  | Hs.46468             | Chemokine (C-C motif) receptor 6                       | CCR6      | 1.039  | 0.113  | 9.17   | <1E-04 |
| 10725 | 192653  | Hs.521973            | WD repeat domain 13                                    | WDR13     | 1.876  | 0.047  | 39.77  | <1E-04 |
| 10734 | 253432  | Hs.437831            | Full length insert cDNA clone YW27A09                  |           | 2.273  | 1.117  | 2.04   | <1E-04 |
| 10763 | 2280621 | Hs.80642             | Signal transducer and activator of transcription 4     | STAT4     | -0.771 | 0.085  | -9.03  | <1E-04 |
| 10781 | 2286609 | Hs.180402            | Zinc finger protein 671                                | ZNF671    | -0.998 | -0.041 | 24.55  | <1E-04 |
| 10826 | 292933  | Hs.436912            | Kinesin family member C1                               | KIFC1     | -0.844 | -0.292 | 2.89   | <1E-04 |
| 10834 | 1258037 | Hs.514885            | Homo sapiens, clone IMAGE:4698842, mRNA                |           | -0.724 | -0.002 | 396.26 | <1E-04 |
| 10883 | 485720  | Hs.533122            | Splicing factor, arginine/serine-rich 10               | SFRS10    | 0.050  | -0.616 | -0.08  | <1E-04 |
| 10905 | 123913  | Hs.560937            | Data not found                                         |           | 1.213  | 0.218  | 5.56   | <1E-04 |
| 10907 | 1978918 | Hs.117062            | Apoptosis-inducing factor, mitochondrion-associated, 2 | AIFM2     | -0.687 | 0.157  | -4.37  | <1E-04 |
| 10914 | 1675423 | Hs.530077            | Paraoxonase 2                                          | PON2      | 1.849  | 0.255  | 7.24   | <1E-04 |
| 10933 | 358936  | Hs.323445            | In multiple clusters                                   |           | -0.942 | 0.162  | -5.83  | <1E-04 |
| 10943 | 1987547 | Hs.128841            | CDNA FLJ41537 fis, clone BRTHA2017985                  |           | -0.785 | 0.039  | -20.25 | <1E-04 |
| 10951 | 489919  | Hs.534359            | In multiple clusters                                   |           | -0.778 | -0.070 | 11.19  | <1E-04 |
| 10970 | 193713  | Hs.496459            | Transcribed locus                                      |           | -0.478 | 0.156  | -3.07  | <1E-04 |
| 10979 | 1986767 | Hs.7165              | Zinc finger protein 259                                | ZNF259    | -0.711 | 0.082  | -8.65  | <1E-04 |
| 10988 | 205986  | Hs.538381            | Transcribed locus                                      |           | -0.613 | -0.024 | 25.32  | <1E-04 |

|       |         |                      |                                                       |          |        |        |         |        |
|-------|---------|----------------------|-------------------------------------------------------|----------|--------|--------|---------|--------|
| 11006 | 198699  | Hs.89714             | Chemokine (C-X-C motif) ligand 5                      | CXCL5    | -0.733 | -0.033 | 22.27   | <1E-04 |
| 11015 | 1989328 | Hs.44898             | CDNA FLJ40901 fis, clone UTERU2003704                 |          | -0.838 | 0.095  | -8.84   | <1E-04 |
| 11059 | 2334538 | Hs.432281            | Transcribed locus                                     |          | -0.447 | 0.111  | -4.04   | <1E-04 |
| 11067 | 204295  | Hs.559465            | Data not found                                        |          | -0.894 | 0.022  | -40.93  | <1E-04 |
| 11096 | 83458   | Hs.201667            | Aldo-keto reductase family 1, member D1               | AKR1D1   | -1.105 | 0.135  | -8.16   | <1E-04 |
| 11099 | 490305  | Hs.482087            | Leucine rich repeat containing 8 family, member D     | LRRC8D   | 0.140  | -0.478 | -0.29   | <1E-04 |
| 11112 | 233794  | Hs.549405            | Data not found                                        |          | 0.152  | -0.739 | -0.21   | <1E-04 |
| 11167 | 2163031 | Hs.550714            | CDNA FLJ37358 fis, clone BRAMY2023172                 |          | -1.013 | -0.032 | 31.74   | <1E-04 |
| 11194 | 1641931 | Hs.474083            | UDP-Gal:betaGlcNAc beta 1,4- galactosyltransferase    | B4GALT2  | -0.794 | 0.228  | -3.49   | <1E-04 |
| 11204 | 86245   | Hs.525557            | Serpin peptidase inhibitor, clade A, member 1         | SERPINA1 | -0.959 | -0.161 | 5.95    | <1E-04 |
| 11240 | 294582  | In multiple clusters | In multiple clusters                                  |          | -0.992 | -0.029 | 34.31   | <1E-04 |
| 11244 | 704619  | Hs.523680            | Structure specific recognition protein 1              | SSRP1    | -0.273 | 0.108  | -2.52   | <1E-04 |
| 11258 | 229505  | Hs.556017            | Chromosome 1 open reading frame 131                   | C1orf131 | -1.191 | -0.247 | 4.82    | <1E-04 |
| 11266 | 954219  | Data not found       | Data not found                                        |          | -0.727 | 0.085  | -8.54   | <1E-04 |
| 11276 | 1269464 | Hs.518129            | Transcribed locus                                     |          | -1.147 | 0.150  | -7.67   | <1E-04 |
| 11285 | 1987401 | Hs.310449            | Solute carrier family 23, member 1                    | SLC23A1  | -1.018 | 0.031  | -32.35  | <1E-04 |
| 11290 | 731118  | Hs.128846            | Signal-regulatory protein alpha                       | SIRPA    | 1.776  | 1.016  | 1.75    | <1E-04 |
| 11294 | 446159  | Hs.100426            | Breast cancer metastasis suppressor 1                 | BRMS1    | -1.303 | -0.120 | 10.87   | <1E-04 |
| 11310 | 1848406 | Hs.111944            | Cytochrome P450, family 3, subfamily A, polypeptide 7 | CYP3A7   | 2.230  | 0.327  | 6.82    | <1E-04 |
| 11328 | 1848515 | Hs.431550            | Data not found                                        |          | -0.579 | 0.296  | -1.96   | <1E-04 |
| 11348 | 430171  | Hs.211038            | Chromosome 8 open reading frame 31                    | C8orf31  | -1.134 | -0.106 | 10.71   | <1E-04 |
| 11382 | 1848643 | Hs.527119            | Data not found                                        |          | 1.883  | 0.556  | 3.39    | <1E-04 |
| 11393 | 2005398 | Hs.9641              | Complement component 1, q subcomponent, A chain       | C1QA     | -0.876 | -0.011 | 79.37   | <1E-04 |
| 11410 | 1524020 | Hs.143674            | RAS guanyl releasing protein 3                        | RASGRP3  | -1.049 | 0.056  | -18.76  | <1E-04 |
| 11419 | 725736  | Hs.23960             | Cyclin B1                                             | CCNB1    | -0.782 | 0.134  | -5.86   | <1E-04 |
| 11420 | 1084278 | Hs.1247              | Transcribed locus                                     |          | -1.691 | 0.013  | -134.71 | <1E-04 |
| 11428 | 1518787 | Hs.405942            | Coiled-coil domain containing 137                     | CCDC137  | -0.649 | 0.358  | -1.81   | <1E-04 |
| 11456 | 109209  | Data not found       | ATP-binding cassette, sub-family D (ALD), member 3    | ABCD3    | -0.164 | 0.111  | -1.48   | <1E-04 |
| 11464 | 1841283 | Hs.501684            | Nucleosome assembly protein 1-like 4                  | NAP1L4   | -0.601 | -0.029 | 20.44   | <1E-04 |
| 11482 | 1714594 | Hs.536848            | Transcribed locus                                     |          | -0.607 | 0.156  | -3.88   | <1E-04 |

|       |         |                |                                                          |           |        |        |          |        |
|-------|---------|----------------|----------------------------------------------------------|-----------|--------|--------|----------|--------|
| 11492 | 109804  | Hs.546557      | SFT2 domain containing 2                                 | SFT2D2    | -1.090 | 0.000  | -7057.62 | <1E-04 |
| 11499 | 51120   | Hs.107510      | Phosphatidic acid phosphatase type 2 domain containing 2 | PPAPDC2   | -0.683 | 0.109  | -6.24    | <1E-04 |
| 11546 | 110550  | Data not found | Data not found                                           |           | -0.742 | 0.113  | -6.56    | <1E-04 |
| 11553 | 210323  | Hs.282703      | Data not found                                           |           | 1.897  | 0.484  | 3.92     | <1E-04 |
| 11555 | 2446486 | Hs.502         | Transporter 2, ATP-binding cassette, sub-family B        | TAP2      | -0.775 | 0.220  | -3.52    | <1E-04 |
| 11573 | 2442658 | Hs.152337      | Protein arginine methyltransferase 3                     | PRMT3     | -1.026 | 0.067  | -15.3    | <1E-04 |
| 11582 | 111734  | Data not found | Data not found                                           |           | -0.369 | 0.171  | -2.16    | <1E-04 |
| 11608 | 1693357 | Hs.1407        | Endothelin 2                                             | EDN2      | -1.356 | -0.018 | 76.93    | <1E-04 |
| 11636 | 113551  | Hs.518505      | Large subunit GTPase 1 homolog (S. cerevisiae)           | LSG1      | -0.746 | 0.136  | -5.47    | <1E-04 |
| 11645 | 2445047 | Hs.468653      | KIAA1841                                                 | KIAA1841  | -1.127 | -0.077 | 14.7     | <1E-04 |
| 11660 | 811031  | Hs.304682      | Cystatin C (amyloid angiopathy and cerebral hemorrhage)  | CST3      | -0.639 | 0.443  | -1.44    | <1E-04 |
| 11699 | 2141529 | Hs.83077       | Interleukin 18 (interferon-gamma-inducing factor)        | IL18      | -0.730 | -0.303 | 2.41     | <1E-04 |
| 11706 | 1850476 | Hs.461263      | Data not found                                           |           | -0.595 | 0.074  | -8.06    | <1E-04 |
| 11717 | 2143952 | Hs.146591      | B lymphoid tyrosine kinase                               | BLK       | -0.974 | 0.064  | -15.24   | <1E-04 |
| 11744 | 81761   | Data not found | Data not found                                           |           | -1.139 | 0.098  | -11.67   | <1E-04 |
| 11798 | 85164   | Hs.119983      | Mannan-binding lectin serine peptidase 2                 | MASP2     | -0.919 | 0.160  | -5.75    | <1E-04 |
| 11833 | 320922  | Hs.553498      | Transcribed locus                                        |           | -1.128 | 0.142  | -7.94    | <1E-04 |
| 11843 | 2154486 | Hs.386567      | Transcribed locus                                        |           | -1.333 | 0.121  | -11.05   | <1E-04 |
| 11851 | 305302  | Hs.478682      | Coiled-coil domain containing 50                         | CCDC50    | -0.647 | 0.135  | -4.79    | <1E-04 |
| 11861 | 2156749 | Hs.167700      | SMAD family member 5                                     | SMAD5     | -0.958 | 0.117  | -8.18    | <1E-04 |
| 11870 | 85642   | Data not found | Data not found                                           |           | -0.771 | 0.302  | -2.55    | <1E-04 |
| 11875 | 753071  | Hs.484885      | Pleckstrin homology-like domain, family A, member 1      | PHLDA1    | -0.361 | 0.255  | -1.42    | <1E-04 |
| 11879 | 2177567 | Hs.105103      | Pellino homolog 2 (Drosophila)                           | PELI2     | -1.506 | 0.157  | -9.62    | <1E-04 |
| 11906 | 115880  | Hs.559340      | Hypothetical protein LOC285074                           | LOC285074 | -1.096 | 0.010  | -108.81  | <1E-04 |
| 11936 | 502305  | Hs.114309      | Apolipoprotein L, 1                                      | APOL1     | 1.692  | 0.421  | 4.02     | <1E-04 |
| 11959 | 2393153 | Hs.73952       | Proline-rich protein HaeIII subfamily 1                  | PRH1      | -0.439 | 0.188  | -2.33    | <1E-04 |
| 11960 | 123516  | Hs.325404      | Phenylalanine hydroxylase                                | PAH       | -0.746 | 0.221  | -3.37    | <1E-04 |
| 11978 | 123857  | Hs.112143      | Data not found                                           |           | -0.930 | 0.104  | -8.91    | <1E-04 |
| 11979 | 108405  | Hs.439552      | Eukaryotic translation elongation factor 1 alpha 1       | EEF1A1    | 0.275  | -0.689 | -0.4     | <1E-04 |
| 11996 | 124611  | Hs.94011       | Necdin-like 2                                            | NDNL2     | -1.117 | 0.145  | -7.69    | <1E-04 |

|       |         |                      |                                                           |         |        |        |        |        |
|-------|---------|----------------------|-----------------------------------------------------------|---------|--------|--------|--------|--------|
| 12032 | 126718  | Hs.273077            | Transmembrane protein 14B                                 | TMEM14B | -0.937 | 0.106  | -8.84  | <1E-04 |
| 12040 | 1674302 | Hs.135399            | Transcribed locus                                         |         | -0.873 | 0.045  | -19.39 | <1E-04 |
| 12049 | 2405473 | Hs.210044            | Transcribed locus                                         |         | -0.831 | 0.327  | -2.54  | <1E-04 |
| 12050 | 129329  | Hs.3887              | Data not found                                            |         | -0.933 | 0.503  | -1.86  | <1E-04 |
| 12058 | 1901687 | Hs.486489            | Ectonucleotide pyrophosphatase/phosphodiesterase 3        | ENPP3   | -1.232 | 0.119  | -10.34 | <1E-04 |
| 12068 | 30236   | Data not found       | Adrenergic, beta, receptor kinase 2                       | ADRBK2  | -0.543 | 0.540  | -1.01  | <1E-04 |
| 12077 | 2451368 | Hs.6834              | Formin binding protein 4                                  | FNBP4   | -0.764 | 0.158  | -4.82  | <1E-04 |
| 12086 | 41581   | Hs.516316            | semaphorin 6C                                             | SEMA6C  | -0.723 | 0.569  | -1.27  | <1E-04 |
| 12095 | 2457201 | Hs.445482            | Transcribed locus                                         |         | -1.022 | -0.025 | 41.65  | <1E-04 |
| 12097 | 359905  | Hs.43666             | Protein tyrosine phosphatase type IVA, member 3           | PTP4A3  | 1.772  | 0.609  | 2.91   | <1E-04 |
| 12122 | 85438   | Hs.511872            | Cytochrome P450, family 2, subfamily C, polypeptide 18    | CYP2C18 | -1.058 | 0.087  | -12.18 | <1E-04 |
| 12123 | 321906  | In multiple clusters | Eukaryotic translation elongation factor 1 alpha 1        | EEF1A1  | 0.272  | -0.797 | -0.34  | <1E-04 |
| 12200 | 809860  | Hs.129159            | Chromosome 7 open reading frame 11                        | C7orf11 | 0.955  | 0.048  | 19.84  | <1E-04 |
| 12201 | 127242  | Hs.52931             | Adrenergic, alpha-1A-, receptor                           | ADRA1A  | 2.165  | 0.502  | 4.32   | <1E-04 |
| 12220 | 1031919 | Hs.244940            | Retinol dehydrogenase 10 (all-trans)                      | RDH10   | -1.032 | 0.142  | -7.28  | <1E-04 |
| 12224 | 470126  | Hs.433381            | Chromosome 6 open reading frame 89                        | C6orf89 | 1.264  | 1.127  | 1.12   | <1E-04 |
| 12229 | 738939  | Hs.133444            | Excision repair cross-complementing                       | ERCC6   | -1.014 | 0.077  | -13.22 | <1E-04 |
| 12232 | 375662  | Hs.386939            | Ubiquitin specific peptidase 7 (herpes virus-associated)  | USP7    | 1.823  | 0.410  | 4.45   | <1E-04 |
| 12269 | 487370  | Hs.501794            | ATPase type 13A1                                          | ATP13A1 | 0.559  | -0.093 | -5.99  | <1E-04 |
| 12274 | 1618665 | Hs.416553            | CDNA FLJ36415 fis, clone THYMU2010917                     |         | -0.838 | 0.121  | -6.94  | <1E-04 |
| 12283 | 786574  | Hs.508010            | Fibronectin type III domain containing 3A                 | FNDC3A  | -0.157 | 0.237  | -0.66  | <1E-04 |
| 12286 | 375668  | Hs.183994            | In multiple clusters                                      |         | -0.485 | 0.009  | -55.18 | <1E-04 |
| 12293 | 2186619 | Hs.125742            | Leucine-rich repeats and calponin homology domain         | LRCH4   | -0.701 | 0.171  | -4.1   | <1E-04 |
| 12298 | 742679  | Hs.503074            | Transmembrane protein 16A                                 | TMEM16A | -0.639 | 0.377  | -1.7   | <1E-04 |
| 12311 | 2186859 | Hs.376208            | Lymphotoxin beta (TNF superfamily, member 3)              | LTB     | -0.903 | 0.081  | -11.19 | <1E-04 |
| 12428 | 155415  | Hs.388024            | Zinc finger protein 76 (expressed in testis)              | ZNF76   | -0.695 | 0.456  | -1.53  | <1E-04 |
| 12445 | 2368650 | Hs.439155            | Data not found                                            |         | -1.053 | 0.055  | -19.12 | <1E-04 |
| 12472 | 1650110 | Hs.558398            | Sine oculis homeobox homolog 1 (Drosophila)               | SIX1    | -0.941 | 0.130  | -7.26  | <1E-04 |
| 12481 | 2255057 | Hs.2303              | Erythropoietin                                            | EPO     | -0.576 | 0.135  | -4.28  | <1E-04 |
| 12490 | 1734951 | Hs.72901             | Cyclin-dependent kinase inhibitor 2B (p15, inhibits CDK4) | CDKN2B  | -0.817 | 0.173  | -4.73  | <1E-04 |

|       |         |                      |                                                        |          |        |        |        |        |
|-------|---------|----------------------|--------------------------------------------------------|----------|--------|--------|--------|--------|
| 12499 | 2321583 | Hs.96704             | Full length insert cDNA clone ZA96G04                  |          | -1.521 | 0.021  | -73.6  | <1E-04 |
| 12508 | 1732823 | Hs.143873            | S100 calcium binding protein A10                       | S100A10  | -0.865 | 0.207  | -4.18  | <1E-04 |
| 12517 | 2467712 | Hs.400625            | Glutamate-rich WD repeat containing 1                  | GRWD1    | -0.455 | 0.374  | -1.22  | <1E-04 |
| 12555 | 308473  | Hs.439552            | Eukaryotic translation elongation factor 1 alpha 1     | EEF1A1   | 0.272  | -0.817 | -0.33  | <1E-04 |
| 12586 | 742711  | Hs.517106            | In multiple clusters                                   |          | 0.612  | -0.270 | -2.27  | <1E-04 |
| 12652 | 1187874 | Hs.473847            | SH3 domain binding glutamic acid-rich protein          | SH3BGR   | -1.198 | -0.031 | 38.06  | <1E-04 |
| 12673 | 365727  | In multiple clusters | In multiple clusters                                   |          | 0.139  | -0.674 | -0.21  | <1E-04 |
| 12688 | 898255  | Hs.386684            | Abelson helper integration site 1                      | AHI1     | -1.095 | -0.008 | 136.48 | <1E-04 |
| 12706 | 942520  | Hs.187624            | Hypothetical protein FLJ20674                          | FLJ20674 | -1.057 | 0.024  | -43.99 | <1E-04 |
| 12715 | 301919  | Hs.129563            | Chromosome 17 open reading frame 59                    | C17orf59 | -1.217 | -0.082 | 14.91  | <1E-04 |
| 12721 | 756490  | Hs.512670            | Branched chain aminotransferase 2, mitochondrial       | BCAT2    | -0.811 | 0.318  | -2.55  | <1E-04 |
| 12724 | 1589998 | Hs.465558            | Non-metastatic cells 6                                 | NME6     | -0.627 | 0.160  | -3.91  | <1E-04 |
| 12725 | 2208194 | Hs.461722            | Trafficking protein particle complex 2-like            | TRAPPC2L | -0.857 | 0.119  | -7.19  | <1E-04 |
| 12733 | 781339  | In multiple clusters | In multiple clusters                                   |          | -0.491 | 0.290  | -1.69  | <1E-04 |
| 12771 | 302012  | In multiple clusters | Major histocompatibility complex, class I, A           | HLA-A    | 0.140  | -0.560 | -0.25  | <1E-04 |
| 12843 | 202916  | In multiple clusters | In multiple clusters                                   |          | 0.259  | -0.435 | -0.6   | <1E-04 |
| 12901 | 760039  | Hs.42217             | Integrin alpha FG-GAP repeat containing 1              | ITFG1    | -0.945 | -0.137 | 6.88   | <1E-04 |
| 12904 | 1682514 | Hs.124854            | Chromosome 7 open reading frame 13                     | C7orf13  | -1.196 | 0.020  | -60.15 | <1E-04 |
| 12913 | 2305614 | Hs.407004            | Transcribed locus                                      |          | -0.687 | 0.175  | -3.92  | <1E-04 |
| 12914 | 221223  | Hs.164060            | Data not found                                         |          | -1.242 | -0.245 | 5.07   | <1E-04 |
| 12922 | 1723169 | Hs.194061            | Ets variant gene 2                                     | ETV2     | -1.178 | 0.162  | -7.27  | <1E-04 |
| 12931 | 2069130 | Hs.476636            | Membrane associated guanylate kinase                   | MAGI1    | -1.093 | 0.087  | -12.57 | <1E-04 |
| 12987 | 110210  | Hs.355643            | RNA binding protein S1, serine-rich domain             | RNPS1    | 0.099  | -0.385 | -0.26  | <1E-04 |
| 12989 | 486650  | In multiple clusters | In multiple clusters                                   |          | 0.611  | -0.807 | -0.76  | <1E-04 |
| 13024 | 376134  | Hs.76152             | Aquaporin 1 (Colton blood group)                       | AQP1     | -0.406 | 0.208  | -1.96  | <1E-04 |
| 13079 | 485964  | Hs.91531             | Myeloid/lymphoid or mixed-lineage leukemia             | MLLT6    | -0.089 | -0.426 | 0.21   | <1E-04 |
| 13102 | 1390584 | Hs.507498            | Mitochondrial intermediate peptidase                   | MIPEP    | -0.418 | 0.168  | -2.49  | <1E-04 |
| 13120 | 1638302 | Hs.49421             | WD repeat domain 78                                    | WDR78    | -0.836 | 0.077  | -10.85 | <1E-04 |
| 13129 | 774107  | Hs.134859            | V-maf musculoaponeurotic fibrosarcoma oncogene homolog | MAF      | -0.472 | 0.055  | -8.64  | <1E-04 |
| 13151 | 487102  | In multiple clusters | In multiple clusters                                   |          | 0.134  | -0.769 | -0.17  | <1E-04 |

|       |         |                      |                                                      |          |        |        |        |        |
|-------|---------|----------------------|------------------------------------------------------|----------|--------|--------|--------|--------|
| 13157 | 2219539 | Hs.10319             | UDP glucuronosyltransferase 2 family, polypeptide B7 | UGT2B7   | -1.212 | 0.070  | -17.27 | <1E-04 |
| 13207 | 758211  | Hs.131212            | Zinc finger and BTB domain containing 39             | ZBTB39   | 1.627  | 0.265  | 6.13   | <1E-04 |
| 13256 | 247761  | Data not found       | Data not found                                       |          | -0.670 | 0.322  | -2.08  | <1E-04 |
| 13310 | 249067  | Hs.518355            | G elongation factor, mitochondrial 1                 | GFM1     | -0.428 | 0.412  | -1.04  | <1E-04 |
| 13328 | 260177  | Hs.435326            | Actin-like 6A                                        | ACTL6A   | -0.582 | 0.144  | -4.04  | <1E-04 |
| 13342 | 773531  | Hs.417022            | Intestinal cell (MAK-like) kinase                    | ICK      | -0.850 | -0.081 | 10.54  | <1E-04 |
| 13346 | 270523  | Hs.203691            | Data not found                                       |          | -0.712 | 0.092  | -7.72  | <1E-04 |
| 13360 | 781142  | In multiple clusters | In multiple clusters                                 |          | 1.613  | 1.202  | 1.34   | <1E-04 |
| 13362 | 275395  | Hs.13205             | Beta 1,3-galactosyltransferase-like                  | B3GALTL  | -0.083 | 0.533  | -0.16  | <1E-04 |
| 13427 | 2222735 | Hs.107410            | Glycine N-methyltransferase                          | GNMT     | -0.386 | 0.281  | -1.37  | <1E-04 |
| 13462 | 898040  | Hs.189174            | Doublesex and mab-3 related transcription factor 3   | DMRT3    | -1.243 | 0.130  | -9.55  | <1E-04 |
| 13475 | 486009  | Hs.11169             | ERBB receptor feedback inhibitor 1                   | ERRFI1   | -0.022 | -1.261 | 0.02   | <1E-04 |
| 13519 | 366897  | In multiple clusters | Ribosomal protein S17                                | RPS17    | -0.216 | -0.443 | 0.49   | <1E-04 |
| 13537 | 365824  | Hs.23650             | MYC-associated zinc finger protein                   | MAZ      | 0.514  | -0.408 | -1.26  | <1E-04 |
| 13540 | 740224  | In multiple clusters | DALR anticodon binding domain containing 3           | DALRD3   | 1.174  | 0.055  | 21.24  | <1E-04 |
| 13553 | 2224715 | Hs.121520            | Adhesion molecule with Ig-like domain 2              | AMIGO2   | -0.763 | 0.115  | -6.62  | <1E-04 |
| 13561 | 726744  | Hs.493887            | Exosome component 3                                  | EXOSC3   | -0.722 | 0.390  | -1.85  | <1E-04 |
| 13570 | 1636365 | Hs.129614            | Transmembrane protein 27                             | TMEM27   | -0.717 | 0.076  | -9.45  | <1E-04 |
| 13579 | 377693  | Hs.476320            | Small nucleolar RNA host gene (non-protein coding) 8 | SNHG8    | -0.178 | 0.349  | -0.51  | <1E-04 |
| 13583 | 486020  | Hs.99936             | Keratin 10                                           | KRT10    | 0.673  | -0.256 | -2.63  | <1E-04 |
| 13592 | 471738  | Hs.175120            | Hypothetical protein FLJ11286                        | FLJ11286 | 0.493  | -0.050 | -9.93  | <1E-04 |
| 13630 | 769010  | Hs.124553            | Zinc finger protein 263                              | ZNF263   | 1.448  | 1.151  | 1.26   | <1E-04 |
| 13640 | 813536  | Hs.464971            | Phosphoinositide-3-kinase, class 3                   | PIK3C3   | 1.978  | 0.348  | 5.69   | <1E-04 |
| 13678 | 1680246 | Hs.1955              | Transcribed locus                                    |          | -0.770 | -0.011 | 70.15  | <1E-04 |
| 13696 | 1736295 | Hs.479954            | Methylenetetrahydrofolate dehydrogenase 2-like       | MTHFD2L  | -0.811 | 0.228  | -3.57  | <1E-04 |
| 13720 | 772455  | Hs.534338            | In multiple clusters                                 |          | 1.733  | 0.309  | 5.61   | <1E-04 |
| 13768 | 1755833 | Hs.471162            | Ras association and pleckstrin homology domains 1    | RAPH1    | -0.274 | 0.310  | -0.89  | <1E-04 |
| 13777 | 2414066 | Hs.488181            | Transcribed locus                                    |          | -0.216 | 0.307  | -0.7   | <1E-04 |
| 13793 | 1662419 | Hs.348297            | Chromosome 20 open reading frame 82                  | C20orf82 | 1.264  | 0.345  | 3.66   | <1E-04 |
| 13795 | 2115733 | Hs.438794            | Data not found                                       |          | -0.505 | 0.299  | -1.69  | <1E-04 |



---

|       |        |           |                                |        |       |        |       |        |
|-------|--------|-----------|--------------------------------|--------|-------|--------|-------|--------|
| 13799 | 488685 | Hs.332382 | BTB (POZ) domain containing 10 | BTBD10 | 0.383 | -0.696 | -0.55 | <1E-04 |
|-------|--------|-----------|--------------------------------|--------|-------|--------|-------|--------|
